# Supplementary material
Source: publisher site journal article supplement (https://www.spandidos-publications.com/7604/downloadSupplementary)
Supplement: Supplementary file 1 [file downloadSupplementary]

## Sheet: Sheet1
Table SIV. Gene Ontology enrichment analysis of manganese metabolism-related Genes in pancreatic ductal adenocarcinoma .
	ONTOLOGY	ID	Description	setSize	enrichmentScore	NES	pvalue	p.adjust	qvalue	rank	leading_edge	core_enrichment
GO:0016477	BP	GO:0016477	cell migration	310	0.480249	1.74457	5.03e-09	1.89e-05	1.65e-05	421	tags=42%, list=26%, signal=38%	CCL18/NOX1/CSF2/MMP9/SERPINB3/COL3A1/TERT/TNFAIP6/CCL20/FN1/PLAT/PTGS2/IL1A/VCAN/CCL19/ITGA2/PLAU/CXCL10/ITGB6/MMP3/CDK1/SELL/CCL7/CDH2/LCK/SELPLG/CCR3/CXCR3/PPARG/CXCR4/APOE/CCL5/ANXA1/F2R/CCL21/TIMP1/SPN/PIK3CG/TREM2/CCL8/PITX2/ITGA4/ITGB2/FERMT3/IFNG/SERPINE1/MMP2/FUT3/AXL/CYP1B1/ADAM9/ITGB5/GBX2/FUT7/CD69/ITGAL/MET/IL4/CCL3/CXCL8/HCK/IL23A/CXCL3/HMOX1/CCR5/DNER/SELP/GRN/P2RY6/TNF/CAV1/TSPO/IT…
GO:0002376	BP	GO:0002376	immune system process	483	0.438811	1.61609	2.28e-08	4.28e-05	3.75e-05	426	tags=38%, list=26%, signal=40%	CCL18/CSF2/SFN/CD70/CHIT1/IL1RN/IDO1/MS4A1/COL3A1/IL2RA/NQO1/TNFAIP6/CCL20/FN1/IL1A/NTS/LCN2/KYNU/CCL19/ITGA2/CXCL10/FOXP3/HLA-DQB1/ITGB6/MMP3/OAS2/HLA-DRB1/SELL/HLA-DRB5/OAS1/CCL7/CTLA4/CD28/LCK/SELPLG/CCR3/CXCR3/PPARG/CXCR4/GPR68/CD40LG/APOE/CCL5/CYSLTR2/ANXA1/F2R/CCL21/CD27/CD55/RUNX2/LTA/SPN/LGALS1/PIK3CG/GRP/TREM2/CCL8/HTR2A/C1QA/PITX2/HCAR2/AHR/ITGA4/LIF/ITGB2/IFNG/POLQ/SERPINE1/PRKCB/TYROB…
GO:0051240	BP	GO:0051240	positive regulation of multicellular organismal process	369	0.455171	1.66482	4.45e-08	5.58e-05	4.88e-05	469	tags=43%, list=29%, signal=40%	NOX1/CSF2/ST8SIA2/ADAM12/CD70/SERPINB3/IDO1/IL2RA/TFAP2A/TERT/FN1/PLAT/PTGS2/IL1A/VCAN/LCN2/HRH1/CCL19/ITGA2/PLAU/FOXP3/HLA-DQB1/CDK1/OAS2/HLA-DRB1/HLA-DRB5/OAS1/CD28/LCK/CCR3/CXCR3/PPARG/HK2/CXCR4/GPR68/CD40LG/APOE/NEFL/CCL5/ANXA1/F2R/CCL21/CD27/CD55/PENK/RUNX2/LTA/SPN/LGALS1/PIK3CG/GRP/TREM2/APLNR/HTR2A/MME/HCAR2/LIF/PKM/IFNG/SERPINE1/UCP2/PRKCB/TYROBP/AXL/HCRT/TGM2/CYP1B1/PCK1/IL4/CCL3/CD4/CXC…
GO:0048870	BP	GO:0048870	cell motility	323	0.453493	1.65494	3.19e-07	0.000299657	0.000262326	421	tags=41%, list=26%, signal=38%	CCL18/NOX1/CSF2/MMP9/SERPINB3/COL3A1/TERT/TNFAIP6/CCL20/FN1/PLAT/PTGS2/IL1A/VCAN/CATSPER1/CCL19/ITGA2/PLAU/CXCL10/ITGB6/MMP3/CDK1/SELL/CCL7/CDH2/LCK/SELPLG/CCR3/CXCR3/PPARG/CXCR4/APOE/CCL5/ANXA1/F2R/CCL21/TIMP1/SPN/PIK3CG/TREM2/CCL8/PITX2/ITGA4/ITGB2/FERMT3/IFNG/SERPINE1/DNAH8/MMP2/FUT3/AXL/CYP1B1/ADAM9/ITGB5/GBX2/FUT7/CD69/ITGAL/MET/IL4/CCL3/CXCL8/HCK/IL23A/CXCL3/HMOX1/CCR5/ACTB/DNER/SELP/GRN/P2…
GO:0006955	BP	GO:0006955	immune response	356	0.445068	1.62539	4.8e-07	0.000360761	0.000315817	426	tags=40%, list=26%, signal=38%	CCL18/CSF2/SFN/CD70/CHIT1/IL1RN/IDO1/MS4A1/COL3A1/IL2RA/NQO1/CCL20/IL1A/NTS/LCN2/KYNU/CCL19/CXCL10/FOXP3/HLA-DQB1/ITGB6/MMP3/OAS2/HLA-DRB1/HLA-DRB5/OAS1/CCL7/CTLA4/CD28/LCK/CCR3/CXCR3/PPARG/CXCR4/CD40LG/APOE/CCL5/CYSLTR2/ANXA1/CCL21/CD27/CD55/LTA/SPN/LGALS1/PIK3CG/GRP/TREM2/CCL8/HTR2A/C1QA/AHR/ITGA4/LIF/ITGB2/IFNG/PRKCB/TYROBP/PXDN/AXL/PDCD1/C1QC/C1QB/FUT7/CD69/ISG20/APCS/ITGAL/PCK1/IL4/CCL3/CD4/…
GO:0050900	BP	GO:0050900	leukocyte migration	132	0.547008	1.87706	5.92e-07	0.000371064	0.000324836	417	tags=50%, list=26%, signal=40%	CCL18/TNFAIP6/CCL20/IL1A/CCL19/ITGA2/CXCL10/SELL/CCL7/LCK/SELPLG/CXCR3/CXCR4/CCL5/ANXA1/CCL21/SPN/PIK3CG/TREM2/CCL8/ITGA4/ITGB2/SERPINE1/MMP2/FUT7/CD69/ITGAL/CCL3/CXCL8/HCK/IL23A/CXCL3/HMOX1/CCR5/SELP/TNF/ITGA1/CCL4/THBS1/CXCR2/GP1BA/MCU/C5AR1/IL1B/CD9/TGFB2/CSF1R/MAPK3/IL6/TRPM2/ITGA9/CXCL6/ITGB3/GNAI1/CCL23/TGFB1/ZAP70/CTSG/ICAM1/SELE/CCR2/FYN/CX3CL1/ADAM10/IL10/PDGFB
GO:0006935	BP	GO:0006935	chemotaxis	114	0.54996	1.85732	7.73e-07	0.000415475	0.000363715	469	tags=55%, list=29%, signal=42%	CCL18/TNFAIP6/CCL20/PLAUR/CCL19/ITGA2/PLAU/CXCL10/CCL7/S100A4/CCR3/CXCR3/CXCR4/CCL5/ANXA1/CCL21/SPN/PIK3CG/TREM2/CCL8/ITGB2/SERPINE1/MMP2/MET/CCL3/CXCL8/IL23A/CXCL3/CCR5/FPR1/ITGA1/FGF2/CCL4/THBS1/CXCR2/MCU/C5AR1/IL1B/TGFB2/CSF1R/MAPK3/IL6/TRPM2/ITGA9/PDGFRB/CXCL6/ITGB3/CCL23/TGFB1/BMPR2/CTSG/NRG1/CCR2/TMSB4X/CX3CL1/ADAM10/IL10/PDGFB/LYN/ITGAV/KIT/EDN1/VCAM1
GO:0042330	BP	GO:0042330	taxis	115	0.544517	1.84374	1.32e-06	0.0005014	0.000438936	469	tags=55%, list=29%, signal=42%	CCL18/TNFAIP6/CCL20/PLAUR/CCL19/ITGA2/PLAU/CXCL10/CCL7/S100A4/CCR3/CXCR3/CXCR4/CCL5/ANXA1/CCL21/SPN/PIK3CG/TREM2/CCL8/ITGB2/SERPINE1/MMP2/MET/CCL3/CXCL8/IL23A/CXCL3/CCR5/FPR1/ITGA1/FGF2/CCL4/THBS1/CXCR2/MCU/C5AR1/IL1B/TGFB2/CSF1R/MAPK3/IL6/TRPM2/ITGA9/PDGFRB/CXCL6/ITGB3/CCL23/TGFB1/BMPR2/CTSG/NRG1/CCR2/TMSB4X/CX3CL1/ADAM10/IL10/PDGFB/LYN/ITGAV/KIT/EDN1/VCAM1
GO:0030334	BP	GO:0030334	regulation of cell migration	221	0.475878	1.69155	1.33e-06	0.0005014	0.000438936	408	tags=43%, list=25%, signal=37%	CCL18/CSF2/MMP9/SERPINB3/COL3A1/TERT/TNFAIP6/CCL20/FN1/PTGS2/IL1A/CCL19/ITGA2/PLAU/CXCL10/MMP3/CCL7/CXCR3/PPARG/CXCR4/APOE/CCL5/ANXA1/F2R/CCL21/TIMP1/SPN/PIK3CG/TREM2/CCL8/ITGA4/FERMT3/IFNG/SERPINE1/MMP2/FUT3/CYP1B1/ADAM9/FUT7/CD69/MET/IL4/CCL3/CXCL8/IL23A/HMOX1/SELP/GRN/P2RY6/TNF/CAV1/LMNA/JUP/LRP1/FGF2/CCL4/THBS1/FGF23/GP1BA/MCU/C5AR1/IL1B/CD9/GNAI2/TGFB2/ITGA5/CSF1R/ADORA3/AKAP12/MAPK3/SNAI1/I…
GO:0007155	BP	GO:0007155	cell adhesion	276	0.461649	1.66616	1.09e-06	0.0005014	0.000438936	417	tags=41%, list=26%, signal=37%	SFN/ADAM12/CD70/IL1RN/IDO1/COMP/COL3A1/IL2RA/TNFAIP6/FN1/IL1A/VCAN/IBSP/PLAUR/CCL19/ITGA2/PLAU/FOXP3/HLA-DQB1/ITGB6/HLA-DRB1/SELL/HLA-DRB5/CTLA4/CDH2/CD28/LCK/SELPLG/CCR3/CXCR3/CXCR4/CD40LG/CCL5/ANXA1/CCL21/CD27/CD55/SPN/LGALS1/PIK3CG/HTR2A/CSTA/ITGA4/LIF/ITGB2/FERMT3/IFNG/SERPINE1/PXDN/MMP2/FUT3/AXL/TGM2/PDCD1/CYP1B1/ADAM9/ITGB5/FUT7/CD69/ITGAL/PCK1/IL4/CD4/CXCL8/OPCML/HCK/IL23A/ACTB/B2M/SELP/AS…
GO:0009605	BP	GO:0009605	response to external stimulus	481	0.414841	1.5282	1.81e-06	0.000618463	0.000541415	428	tags=38%, list=26%, signal=40%	CCL18/CSF2/SFN/MMP9/CHIT1/IDO1/MS4A1/IL2RA/NQO1/TNFAIP6/CCL20/SLC2A1/PLAT/PTGS2/IL1A/NTS/PLAUR/LCN2/KYNU/UGT1A1/CCL19/ITGA2/PLAU/CXCL10/FOXP3/ITGB6/MMP3/OAS2/HLA-DRB1/OAS1/CCL7/CDH2/S100A4/CD28/LCK/CCR3/CXCR3/PPARG/CXCR4/APOE/CCL5/ANXA1/F2R/RPE65/CCL21/CD55/PENK/LTA/SPN/LGALS1/PIK3CG/GRP/TREM2/CCL8/HTR2A/C1QA/AHR/ITGB2/IFNG/SERPINE1/SERPINB2/TYROBP/MMP2/AXL/ADAM9/C1QC/C1QB/FUT7/ISG20/APCS/PCK1/ME…
GO:2000514	BP	GO:2000514	regulation of CD4-positive, α-β T cell activation	19	0.799422	2.02344	2.25e-06	0.000651553	0.000570383	284	tags=74%, list=17%, signal=62%	IL2RA/CCL19/FOXP3/HLA-DRB1/CD28/ANXA1/CD55/LGALS1/IFNG/CD69/IL23A/NLRP3/IL2/IL18
GO:0002682	BP	GO:0002682	regulation of immune system process	314	0.444153	1.61565	2.22e-06	0.000651553	0.000570383	426	tags=40%, list=26%, signal=37%	SFN/CD70/IDO1/MS4A1/COL3A1/IL2RA/TNFAIP6/CCL20/FN1/IL1A/CCL19/ITGA2/CXCL10/FOXP3/HLA-DQB1/HLA-DRB1/HLA-DRB5/OAS1/CCL7/CTLA4/CD28/LCK/CXCR3/PPARG/GPR68/CD40LG/APOE/CCL5/ANXA1/CCL21/CD27/CD55/LTA/SPN/LGALS1/TREM2/CCL8/HTR2A/C1QA/HCAR2/AHR/ITGA4/LIF/ITGB2/IFNG/SERPINE1/PRKCB/TYROBP/AXL/PDCD1/C1QC/C1QB/FUT7/CD69/APCS/PCK1/IL4/CCL3/CD4/CXCL8/HCK/PLA2G2A/IL23A/HMOX1/ACTB/B2M/NOS2/ACP5/BIRC3/SELP/GRN/CD…
GO:2000026	BP	GO:2000026	regulation of multicellular organismal development	282	0.4443	1.60497	4.77e-06	0.00128006	0.00112059	415	tags=41%, list=26%, signal=37%	SFN/MMP9/ST8SIA2/ADAM12/COMP/IL2RA/TFAP2A/TERT/TNFAIP6/FN1/IL1A/VCAN/CCL19/CXCL10/FOXP3/PTHLH/XDH/CDK1/OAS2/HLA-DRB1/CTLA4/CD28/CCR3/CXCR3/PPARG/HK2/CXCR4/GPR68/NEFL/ANXA1/CD27/RUNX2/LTA/LGALS1/PIK3CG/TREM2/APLNR/MME/LIF/PKM/IFNG/SERPINE1/PRKCB/TYROBP/AXL/TGM2/CYP1B1/C1QC/GBX2/CD69/APCS/PCK1/IL4/CCL3/CD4/CXCL8/IL23A/HMOX1/ACTB/B2M/FASLG/CFL1/GRN/BDNF/SLC8A1/TNF/OXT/CAV1/NLRP3/TSPO/B4GALT5/JUP/TNF…
GO:0098552	CC	GO:0098552	side of membrane	143	0.510496	1.76137	6.51e-06	0.00163085	0.00142768	442	tags=49%, list=27%, signal=39%	ALPP/ALPI/MS4A1/IL2RA/PLAUR/ITGA2/PLAU/CXCL10/HLA-DQB1/ITGB6/HLA-DRB1/SELL/HLA-DRB5/CTLA4/CD28/CCR3/CXCR3/CXCR4/CD40LG/LCT/CD27/CD55/SPN/ATP2C2/ITGA4/ITGB2/PDCD1/ADAM9/CD69/ITGAL/CD4/OPCML/HCK/CTSB/CCR5/B2M/FASLG/SELP/ABCB1/TNF/ITGAM/ITGA1/JUP/THBS1/CXCR2/CD8A/CD14/GP1BA/CD9/GNAI2/ITGA5/TLR4/ITGA9/ITGB3/GNAI1/LDLR/ZAP70/TH/ICAM1/SELE/CCR2/CLEC4A/ACE/ACHE/FAS/F2/TRAF2/PRNP/LYN/ITGAV
GO:0006954	BP	GO:0006954	inflammatory response	252	0.455802	1.63802	7.04e-06	0.0016547	0.00144855	415	tags=43%, list=26%, signal=38%	CCL18/NOX1/MMP9/IL1RN/IDO1/IL2RA/TNFAIP6/CCL20/FN1/PTGS2/IL1A/HRH1/UGT1A1/CCL19/NOX4/CXCL10/FOXP3/ITGB6/MMP3/HLA-DRB1/CCL7/CD28/CCR3/CXCR3/PPARG/CXCR4/GPR68/CD40LG/APOE/CCL5/ANXA1/F2R/CCL21/TIMP1/LTA/SPN/LGALS1/PIK3CG/TREM2/CCL8/HTR2A/C1QA/AHR/SERPINA1/ITGB2/IFNG/SERPINE1/TYROBP/AXL/FUT7/APCS/ITGAL/IL4/CCL3/CARD16/CXCL8/HCK/PLA2G2A/IL23A/CXCL3/HMOX1/CCR5/NOS2/ACP5/BIRC3/SELP/GRN/ASS1/TNF/FPR1/ITG…
GO:0032101	BP	GO:0032101	regulation of response to external stimulus	254	0.44915	1.61422	9.69e-06	0.00214279	0.00187584	426	tags=39%, list=26%, signal=34%	SFN/MMP9/IDO1/IL2RA/TNFAIP6/PLAT/PTGS2/PLAUR/CCL19/ITGA2/PLAU/CXCL10/FOXP3/MMP3/HLA-DRB1/OAS1/CCL7/CD28/CXCR3/PPARG/CXCR4/APOE/CCL5/ANXA1/F2R/CCL21/CD55/LTA/SPN/LGALS1/PIK3CG/TREM2/HTR2A/AHR/IFNG/SERPINE1/SERPINB2/TYROBP/FUT7/APCS/MET/IL4/CCL3/CARD16/CXCL8/HCK/PLA2G2A/IL23A/ACP5/BIRC3/GRN/CFH/TNF/CAV1/NLRP3/TNFRSF1B/IL2/FGF2/CCL4/THBS1/IL18/CD14/GP1BA/SNCA/MCU/C5AR1/IL1B/CD9/CSF1R/BMP6/CYBA/GPX1/…
GO:0035710	BP	GO:0035710	CD4-positive, α-β T cell activation	27	0.73199	1.97385	1.06e-05	0.00221008	0.00193475	328	tags=63%, list=20%, signal=51%	IL2RA/CCL19/FOXP3/HLA-DRB1/CD28/ANXA1/CD55/SPN/LGALS1/IFNG/FUT7/CD69/IL23A/NLRP3/IL2/IL18/IL6
GO:0002685	BP	GO:0002685	regulation of leukocyte migration	80	0.56973	1.83464	1.2e-05	0.00224771	0.00196769	408	tags=50%, list=25%, signal=39%	TNFAIP6/CCL20/IL1A/CCL19/ITGA2/CXCL10/CCL7/CXCR3/CCL5/ANXA1/CCL21/SPN/TREM2/CCL8/ITGA4/SERPINE1/FUT7/CD69/CCL3/CXCL8/IL23A/HMOX1/SELP/TNF/CCL4/THBS1/GP1BA/MCU/C5AR1/CD9/CSF1R/MAPK3/IL6/ITGB3/TGFB1/ICAM1/SELE/CCR2/CX3CL1/ADAM10
GO:0098609	BP	GO:0098609	cell-cell adhesion	197	0.470668	1.6618	1.16e-05	0.00224771	0.00196769	401	tags=42%, list=25%, signal=36%	SFN/CD70/IL1RN/IDO1/COMP/IL2RA/IL1A/PLAUR/CCL19/ITGA2/FOXP3/HLA-DQB1/ITGB6/HLA-DRB1/SELL/HLA-DRB5/CTLA4/CDH2/CD28/LCK/SELPLG/CD40LG/CCL5/ANXA1/CCL21/CD27/CD55/SPN/LGALS1/PIK3CG/HTR2A/CSTA/ITGA4/ITGB2/FERMT3/IFNG/FUT3/PDCD1/CYP1B1/ADAM9/ITGB5/FUT7/CD69/ITGAL/PCK1/IL4/CD4/IL23A/ACTB/B2M/SELP/ASS1/TNF/CAV1/ITGAM/NLRP3/TNFSF13B/ITGA1/JUP/IL2/IL18/GP1BA/IL1B/CD9/TGFB2/ITGA5/BMP6/IL6/GRID2/IL7/ITGA9/PN…
GO:0002292	BP	GO:0002292	T cell differentiation involved in immune response	20	0.757968	1.93811	1.39e-05	0.00244945	0.00214429	328	tags=70%, list=20%, signal=57%	CCL19/FOXP3/HLA-DRB1/ANXA1/SPN/LGALS1/IFNG/CD69/PCK1/IL23A/NLRP3/IL2/IL18/IL6
GO:0097530	BP	GO:0097530	granulocyte migration	57	0.606168	1.85463	1.43e-05	0.00244945	0.00214429	371	tags=53%, list=23%, signal=42%	CCL18/TNFAIP6/IL1A/CCL19/CXCL10/CCL7/CCL5/ANXA1/CCL21/PIK3CG/CCL8/ITGB2/FUT7/CCL3/CXCL8/IL23A/CXCL3/ITGA1/CCL4/THBS1/CXCR2/MCU/C5AR1/IL1B/TGFB2/CSF1R/MAPK3/ITGA9/CXCL6/CCL23
GO:0009897	CC	GO:0009897	external side of plasma membrane	98	0.532852	1.76852	1.52e-05	0.00249004	0.00217983	479	tags=59%, list=29%, signal=44%	MS4A1/IL2RA/PLAUR/ITGA2/PLAU/CXCL10/ITGB6/HLA-DRB1/SELL/CTLA4/CD28/CCR3/CXCR3/CXCR4/CD40LG/LCT/CD27/SPN/ITGA4/ITGB2/PDCD1/ADAM9/CD69/ITGAL/CD4/CTSB/CCR5/B2M/FASLG/SELP/ABCB1/TNF/ITGAM/ITGA1/THBS1/CXCR2/CD8A/CD14/GP1BA/CD9/ITGA5/TLR4/ITGA9/ITGB3/LDLR/ICAM1/SELE/CCR2/CLEC4A/ACE/FAS/F2/PRNP/ITGAV/NCAM1/KIT/VCAM1/ANXA5
GO:0030155	BP	GO:0030155	regulation of cell adhesion	190	0.47659	1.67843	1.63e-05	0.00255308	0.00223502	417	tags=44%, list=26%, signal=37%	SFN/CD70/IL1RN/IDO1/IL2RA/FN1/IL1A/IBSP/PLAUR/CCL19/ITGA2/PLAU/FOXP3/HLA-DQB1/HLA-DRB1/HLA-DRB5/CTLA4/CD28/LCK/CXCR3/CXCR4/CD40LG/CCL5/ANXA1/CCL21/CD27/CD55/SPN/LGALS1/PIK3CG/HTR2A/ITGA4/LIF/ITGB2/FERMT3/IFNG/SERPINE1/MMP2/FUT3/TGM2/PDCD1/CYP1B1/ADAM9/FUT7/CD69/PCK1/IL4/CD4/CXCL8/IL23A/ACTB/B2M/SELP/ASS1/TNF/CAV1/NLRP3/TNFSF13B/JUP/IL2/THBS1/IL18/GP1BA/IL1B/CD9/TGFB2/ITGA5/BMP6/IL6/IL7/PNP/ITGB3/…
GO:0002687	BP	GO:0002687	positive regulation of leukocyte migration	60	0.603676	1.8633	1.76e-05	0.00256588	0.00224623	408	tags=55%, list=25%, signal=43%	CCL20/IL1A/CCL19/ITGA2/CXCL10/CCL7/CCL5/CCL21/SPN/TREM2/CCL8/ITGA4/SERPINE1/FUT7/CCL3/CXCL8/IL23A/SELP/TNF/CCL4/THBS1/MCU/C5AR1/CSF1R/MAPK3/IL6/ITGB3/TGFB1/ICAM1/SELE/CCR2/CX3CL1/ADAM10
GO:0071674	BP	GO:0071674	mononuclear cell migration	74	0.568767	1.8101	1.84e-05	0.00256588	0.00224623	417	tags=55%, list=26%, signal=43%	CCL20/CCL19/CXCL10/CCL7/CXCR4/CCL5/ANXA1/CCL21/SPN/PIK3CG/TREM2/CCL8/ITGA4/SERPINE1/MMP2/FUT7/CD69/ITGAL/CCL3/CCR5/TNF/CCL4/THBS1/CXCR2/C5AR1/CD9/CSF1R/MAPK3/IL6/TRPM2/ITGB3/GNAI1/CCL23/TGFB1/ZAP70/CTSG/ICAM1/CCR2/CX3CL1/ADAM10/PDGFB
GO:0008283	BP	GO:0008283	cell population proliferation	403	0.404882	1.48331	1.79e-05	0.00256588	0.00224623	447	tags=38%, list=28%, signal=37%	NOX1/CSF2/SFN/MMP9/CD70/SERPINB3/IDO1/COMP/MS4A1/COL3A1/IL2RA/TFAP2A/TERT/FN1/PTGS2/IL1A/VCAN/GUCY2C/CCL19/ITGA2/NOX4/PLAU/CXCL10/FOXP3/PTHLH/XDH/CDK1/HLA-DRB1/CTLA4/CDH2/CD28/CCR3/BIRC5/CXCR3/NPR3/PPARG/CDKN3/CD40LG/APOE/CCL5/ANXA1/F2R/TIMP1/CD55/PENK/RUNX2/LTA/SPN/PIK3CG/TREM2/FABP3/CCL8/APLNR/HTR2A/PITX2/FOXM1/AHR/ITGA4/LIF/IFNG/TYROBP/MMP2/CCNB1/FUT3/CYP1B1/GBX2/CCNA2/MAP4K1/IL4/CXCL8/HCK/IL2…
GO:0043367	BP	GO:0043367	CD4-positive, α-β T cell differentiation	19	0.7643	1.93454	2.41e-05	0.003017	0.00264114	328	tags=74%, list=20%, signal=59%	CCL19/FOXP3/HLA-DRB1/ANXA1/SPN/LGALS1/IFNG/FUT7/CD69/IL23A/NLRP3/IL2/IL18/IL6
GO:0050921	BP	GO:0050921	positive regulation of chemotaxis	49	0.625453	1.85375	2.38e-05	0.003017	0.00264114	417	tags=59%, list=26%, signal=45%	CCL19/ITGA2/CXCL10/CCL7/CXCR3/CXCR4/CCL5/CCL21/TREM2/SERPINE1/MET/CCL3/CXCL8/IL23A/FGF2/CCL4/THBS1/MCU/C5AR1/CSF1R/MAPK3/IL6/PDGFRB/TGFB1/BMPR2/CCR2/TMSB4X/ADAM10/PDGFB
GO:0009986	CC	GO:0009986	cell surface	196	0.467784	1.6501	2.27e-05	0.003017	0.00264114	487	tags=49%, list=30%, signal=39%	ALPP/MS4A1/IL2RA/PLAT/IL1A/IL1RAPL2/PLAUR/ITGA2/PLAU/CXCL10/ITGB6/HLA-DRB1/SELL/CTLA4/CDH2/CD28/CCR3/CXCR3/CXCR4/CD40LG/ANXA1/LCT/F2R/CD27/CD55/SPN/MME/ITGA4/ITGB2/TYROBP/PXDN/AXL/PDCD1/ADAM9/ITGB5/ANTXR2/CD69/ITGAL/MET/CD4/CTSB/CCR5/B2M/FASLG/SELP/CD38/ABCB1/TNF/ITGAM/ITGA1/THBS1/CXCR2/CD8A/CD14/GP1BA/CD9/SLC34A1/ENO1/ITGA5/CSF1R/KCNA1/SORL1/TLR4/ITGA9/ITGB3/TGFA/LTF/LDLR/TGFB1/BMPR2/PROM1/NOTCH…
GO:0030335	BP	GO:0030335	positive regulation of cell migration	170	0.477799	1.67269	2.91e-05	0.00352647	0.00308714	408	tags=44%, list=25%, signal=37%	CCL18/CSF2/MMP9/SERPINB3/TERT/TNFAIP6/CCL20/FN1/PTGS2/IL1A/CCL19/ITGA2/PLAU/CXCL10/CCL7/CXCR4/CCL5/ANXA1/F2R/CCL21/SPN/PIK3CG/TREM2/CCL8/ITGA4/FERMT3/IFNG/SERPINE1/MMP2/CYP1B1/ADAM9/FUT7/MET/IL4/CCL3/CXCL8/IL23A/HMOX1/SELP/GRN/P2RY6/TNF/CAV1/FGF2/CCL4/THBS1/MCU/C5AR1/IL1B/GNAI2/TGFB2/ITGA5/CSF1R/AKAP12/MAPK3/SNAI1/IL6/TLR4/HIF1A/PDGFRB/ANXA3/AGT/ITGB3/CCL23/TGFB1/BMPR2/ACVR1/PFN1/ICAM1/SELE/CCR2/…
GO:0040011	BP	GO:0040011	locomotion	277	0.433549	1.56413	3.25e-05	0.00381762	0.00334202	417	tags=41%, list=26%, signal=37%	CCL18/CSF2/MMP9/SERPINB3/COL3A1/TERT/TNFAIP6/CCL20/FN1/PTGS2/IL1A/PLAUR/CATSPER1/CCL19/ITGA2/PLAU/CXCL10/MMP3/CCL7/S100A4/CCR3/CXCR3/PPARG/CXCR4/APOE/NEFL/CCL5/ANXA1/F2R/CCL21/TIMP1/SPN/PIK3CG/TREM2/CCL8/ITGA4/ITGB2/FERMT3/IFNG/SERPINE1/MMP2/FUT3/CYP1B1/ADAM9/FUT7/CD69/MET/IL4/CCL3/CXCL8/IL23A/CXCL3/HMOX1/CCR5/SELP/GRN/P2RY6/TNF/FPR1/CAV1/ITGA1/LMNA/JUP/LRP1/FGF2/CCL4/THBS1/CXCR2/FGF23/GP1BA/SNCA…
GO:0060326	BP	GO:0060326	cell chemotaxis	91	0.545374	1.78842	3.54e-05	0.00403793	0.00353488	469	tags=56%, list=29%, signal=42%	CCL18/TNFAIP6/CCL20/CCL19/CXCL10/CCL7/CCR3/CXCR3/CXCR4/CCL5/ANXA1/CCL21/PIK3CG/CCL8/ITGB2/SERPINE1/MMP2/MET/CCL3/CXCL8/IL23A/CXCL3/CCR5/ITGA1/FGF2/CCL4/THBS1/CXCR2/MCU/C5AR1/IL1B/TGFB2/CSF1R/MAPK3/IL6/TRPM2/ITGA9/PDGFRB/CXCL6/CCL23/CTSG/CCR2/TMSB4X/CX3CL1/ADAM10/IL10/PDGFB/LYN/KIT/EDN1/VCAM1
GO:0043543	BP	GO:0043543	protein acylation	15	-0.827539	-2.20039	4.16e-05	0.00459741	0.00402467	2	tags=13%, list=0%, signal=13%	KAT5/XBP1
GO:0006952	BP	GO:0006952	defense response	387	0.402729	1.47605	4.43e-05	0.00476173	0.00416852	426	tags=37%, list=26%, signal=36%	CCL18/NOX1/SFN/MMP9/IL1RN/IDO1/IL2RA/NQO1/TNFAIP6/CCL20/FN1/PTGS2/IL1A/NTS/LCN2/KYNU/HRH1/UGT1A1/CCL19/NOX4/CXCL10/FOXP3/ITGB6/MMP3/OAS2/HLA-DRB1/OAS1/CCL7/CD28/LCK/CCR3/CXCR3/PPARG/CXCR4/GPR68/CD40LG/APOE/CCL5/ANXA1/F2R/CCL21/TIMP1/CD55/PENK/LTA/SPN/LGALS1/PIK3CG/GRP/TREM2/CCL8/HTR2A/C1QA/AHR/SERPINA1/ITGB2/IFNG/SERPINE1/TYROBP/AXL/C1QC/C1QB/FUT7/ISG20/APCS/ITGAL/IL4/CCL3/CD4/CARD16/CXCL8/HVCN1/…
GO:0071621	BP	GO:0071621	granulocyte chemotaxis	51	0.607178	1.8102	4.79e-05	0.00500564	0.00438204	371	tags=55%, list=23%, signal=44%	CCL18/TNFAIP6/CCL19/CXCL10/CCL7/CCL5/ANXA1/CCL21/PIK3CG/CCL8/ITGB2/CCL3/CXCL8/IL23A/CXCL3/ITGA1/CCL4/THBS1/CXCR2/MCU/C5AR1/IL1B/TGFB2/CSF1R/MAPK3/ITGA9/CXCL6/CCL23
GO:0042127	BP	GO:0042127	regulation of cell population proliferation	357	0.408467	1.49126	5.38e-05	0.00547191	0.00479022	447	tags=39%, list=28%, signal=37%	NOX1/CSF2/SFN/MMP9/CD70/SERPINB3/IDO1/COMP/IL2RA/TFAP2A/TERT/FN1/PTGS2/IL1A/VCAN/GUCY2C/CCL19/ITGA2/NOX4/PLAU/CXCL10/FOXP3/PTHLH/XDH/CDK1/HLA-DRB1/CTLA4/CDH2/CD28/CCR3/BIRC5/CXCR3/NPR3/PPARG/CDKN3/CD40LG/APOE/CCL5/ANXA1/F2R/TIMP1/CD55/RUNX2/LTA/SPN/TREM2/FABP3/CCL8/APLNR/HTR2A/PITX2/FOXM1/AHR/ITGA4/LIF/IFNG/TYROBP/MMP2/CCNB1/FUT3/CYP1B1/CCNA2/IL4/CXCL8/HCK/IL23A/HMOX1/ACTB/B2M/FASLG/NOS2/GRN/CD38…
GO:0002819	BP	GO:0002819	regulation of adaptive immune response	53	0.604035	1.82022	5.92e-05	0.00585346	0.00512423	423	tags=57%, list=26%, signal=43%	CCL19/FOXP3/HLA-DRB1/CD28/ANXA1/CD55/LTA/SPN/LGALS1/TREM2/AHR/PDCD1/FUT7/CD69/IL4/CD4/IL23A/B2M/TNF/NLRP3/TNFSF13B/TNFRSF1B/IL2/IL18/IL1B/IL6/TGFB1/CCR2/IL10/TRAF2
GO:0030595	BP	GO:0030595	leukocyte chemotaxis	74	0.553678	1.76208	6.31e-05	0.00607912	0.00532178	466	tags=58%, list=29%, signal=43%	CCL18/TNFAIP6/CCL19/CXCL10/CCL7/CXCR4/CCL5/ANXA1/CCL21/PIK3CG/CCL8/ITGB2/SERPINE1/MMP2/CCL3/CXCL8/IL23A/CXCL3/CCR5/ITGA1/CCL4/THBS1/CXCR2/MCU/C5AR1/IL1B/TGFB2/CSF1R/MAPK3/IL6/TRPM2/ITGA9/CXCL6/CCL23/CTSG/CCR2/CX3CL1/ADAM10/IL10/PDGFB/LYN/KIT/EDN1
GO:0002684	BP	GO:0002684	positive regulation of immune system process	244	0.433751	1.55503	6.57e-05	0.00617629	0.00540685	426	tags=41%, list=26%, signal=36%	CD70/IDO1/MS4A1/IL2RA/CCL20/IL1A/CCL19/ITGA2/CXCL10/FOXP3/HLA-DQB1/HLA-DRB1/HLA-DRB5/OAS1/CCL7/CTLA4/CD28/LCK/GPR68/CD40LG/CCL5/ANXA1/CCL21/CD27/CD55/LTA/SPN/LGALS1/TREM2/CCL8/HTR2A/C1QA/HCAR2/ITGA4/LIF/ITGB2/IFNG/SERPINE1/PRKCB/TYROBP/AXL/C1QC/C1QB/FUT7/PCK1/IL4/CCL3/CD4/CXCL8/HCK/IL23A/ACTB/B2M/NOS2/BIRC3/SELP/CD38/CFH/TNF/FPR1/CAV1/ITGAM/NLRP3/TNFSF13B/IL2/CCL4/THBS1/IL18/CD8A/CD14/MCU/C5AR1/I…
GO:0022407	BP	GO:0022407	regulation of cell-cell adhesion	136	0.489632	1.68564	7.1e-05	0.00650761	0.00569689	401	tags=45%, list=25%, signal=37%	SFN/CD70/IL1RN/IDO1/IL2RA/IL1A/PLAUR/CCL19/FOXP3/HLA-DQB1/HLA-DRB1/HLA-DRB5/CTLA4/CD28/LCK/CD40LG/CCL5/ANXA1/CCL21/CD27/CD55/SPN/LGALS1/HTR2A/ITGA4/ITGB2/FERMT3/IFNG/FUT3/PDCD1/FUT7/CD69/PCK1/IL4/CD4/IL23A/ACTB/B2M/SELP/ASS1/TNF/CAV1/NLRP3/TNFSF13B/IL2/IL18/GP1BA/IL1B/CD9/BMP6/IL6/IL7/PNP/PRKG1/TGFB1/ZAP70/CTSG/SELE/CCR2/FYN/CX3CL1
GO:0019955	MF	GO:0019955	cytokine binding	38	0.644946	1.84279	7.45e-05	0.0066674	0.00583677	468	tags=68%, list=29%, signal=50%	IL1RN/COMP/IL2RA/CCR3/CXCR3/CXCR4/ITGA4/PXDN/CD4/CCR5/TNFRSF1B/FGF2/THBS1/CXCR2/CSF1R/CASP1/ITGB3/BMPR2/ACVR1/CCR2/TGFBR1/TRAF2/A2M/ITGAV/KIT/ACKR1
GO:0007166	BP	GO:0007166	cell surface receptor signaling pathway	493	0.384875	1.41684	8.08e-05	0.00706689	0.0061865	448	tags=37%, list=28%, signal=38%	CCL18/CSF2/MMP9/CD70/IL1RN/KRT19/COMP/MS4A1/COL3A1/COL1A2/IL2RA/TERT/TNFAIP6/CCL20/FN1/PLAT/IGFBP1/IL1A/IL1RAPL2/PLAUR/GUCY2C/CCL19/ITGA2/PLAU/CXCL10/FOXP3/HLA-DQB1/ITGB6/XDH/OAS2/HLA-DRB1/OAS1/CCL7/CTLA4/CDH2/CD28/LCK/CCR3/CXCR3/PPARG/CXCR4/CD40LG/APOE/CCL5/ANXA1/F2R/CCL21/CD27/TIMP1/CD55/RUNX2/LTA/SPN/TREM2/CCL8/ITGA4/LIF/ITGB2/FERMT3/IFNG/SERPINE1/PRKCB/TYROBP/PXDN/MMP2/CALCR/AXL/HCRT/CYP1B1/A…
GO:0002822	BP	GO:0002822	regulation of adaptive immune response based on somatic recombination of immune receptors built from immunoglobulin superfamily domains	52	0.606156	1.81747	8.39e-05	0.00717193	0.00627845	423	tags=58%, list=26%, signal=44%	CCL19/FOXP3/HLA-DRB1/CD28/ANXA1/CD55/LTA/SPN/LGALS1/TREM2/AHR/PDCD1/FUT7/CD69/IL4/CD4/IL23A/B2M/TNF/NLRP3/TNFSF13B/TNFRSF1B/IL2/IL18/IL1B/IL6/TGFB1/CCR2/IL10/TRAF2
GO:0005102	MF	GO:0005102	signaling receptor binding	322	0.41477	1.51283	9.88e-05	0.00807267	0.00706698	486	tags=44%, list=30%, signal=39%	CCL18/CSF2/CD70/IL1RN/COMP/MS4A1/COL3A1/CCL20/FN1/PLAT/IGFBP1/IL1A/NTS/IBSP/PLAUR/CCL19/ITGA2/CXCL10/PTHLH/ITGB6/HLA-DRB1/CCL7/S100A4/LCK/SELPLG/CD40LG/APOE/CCL5/ANXA1/F2R/CCL21/TIMP1/PENK/LTA/LGALS1/PIK3CG/GRP/TREM2/CCL8/ITGA4/LIF/ITGB2/FERMT3/IFNG/SERPINE1/TYROBP/PXDN/CCNB1/HCRT/ADAM9/ITGB5/ITGAL/IL4/CCL3/CD4/CXCL8/HCK/IL23A/CXCL3/SYT1/FASLG/DNER/SELP/GRN/BDNF/TNF/OXT/FPR1/CAV1/ITGAM/TNFSF13B/I…
GO:0048584	BP	GO:0048584	positive regulation of response to stimulus	456	0.386618	1.41778	9.67e-05	0.00807267	0.00706698	448	tags=36%, list=28%, signal=36%	NOX1/MMP9/IDO1/MS4A1/COL3A1/TERT/FN1/PLAT/PTGS2/IL1A/NTS/PLAUR/CCL19/ITGA2/NOX4/PLAU/CXCL10/FOXP3/HLA-DQB1/XDH/HLA-DRB1/HLA-DRB5/OAS1/CCL7/CTLA4/CDH2/S100A4/CD28/LCK/BIRC5/CXCR3/PPARG/CXCR4/CD40LG/APOE/CCL5/ANXA1/F2R/CCL21/CD27/CD55/PENK/LTA/LGALS1/PIK3CG/GRP/TREM2/HTR2A/C1QA/FOXM1/LIF/ITGB2/IFNG/SERPINE1/PRKCB/TYROBP/MMP2/CALCR/AXL/TGM2/CYP1B1/ADAM9/C1QC/C1QB/PCK1/MET/MAP4K1/IL4/CCL3/CD4/CARD16/…
GO:0002287	BP	GO:0002287	α-β T cell activation involved in immune response	18	0.761317	1.90114	0.000105483	0.00809417	0.0070858	328	tags=72%, list=20%, signal=58%	CCL19/FOXP3/HLA-DRB1/ANXA1/SPN/LGALS1/IFNG/CD69/IL23A/NLRP3/IL2/IL18/IL6
GO:0002293	BP	GO:0002293	α-β T cell differentiation involved in immune response	18	0.761317	1.90114	0.000105483	0.00809417	0.0070858	328	tags=72%, list=20%, signal=58%	CCL19/FOXP3/HLA-DRB1/ANXA1/SPN/LGALS1/IFNG/CD69/IL23A/NLRP3/IL2/IL18/IL6
GO:0002294	BP	GO:0002294	CD4-positive, α-β T cell differentiation involved in immune response	18	0.761317	1.90114	0.000105483	0.00809417	0.0070858	328	tags=72%, list=20%, signal=58%	CCL19/FOXP3/HLA-DRB1/ANXA1/SPN/LGALS1/IFNG/CD69/IL23A/NLRP3/IL2/IL18/IL6
GO:0043370	BP	GO:0043370	regulation of CD4-positive, α-β T cell differentiation	12	0.828005	1.86851	0.000115504	0.00868591	0.00760382	284	tags=92%, list=17%, signal=76%	CCL19/FOXP3/HLA-DRB1/ANXA1/LGALS1/IFNG/CD69/IL23A/NLRP3/IL2/IL18
GO:0030855	BP	GO:0030855	epithelial cell differentiation	108	0.504232	1.6965	0.00011789	0.00869146	0.00760868	393	tags=44%, list=24%, signal=35%	SFN/MMP9/SULT1B1/KRT19/IL1A/ITGA2/FOXP3/XDH/CDK1/CDH2/PPARG/CXCR4/ANXA1/PITX2/CSTA/LIF/IFNG/SERPINE1/ADAM9/COL4A1/PCK1/MET/CTSB/TNF/CAV1/IVL/FGF2/CES1/FOXE3/IL1B/TGFB2/PDE4D/BMP6/MAF/GPX1/HIF1A/SLC39A2/MAP1B/STAT1/PGK1/TGFB1/TAGLN/BMPR2/PROM1/ACVR1/NRG1/ICAM1
GO:0060429	BP	GO:0060429	epithelium development	187	0.449819	1.58381	0.000163302	0.011808	0.010337	573	tags=51%, list=35%, signal=37%	SFN/MMP9/SULT1B1/KRT19/TFAP2A/IL1A/ITGA2/CXCL10/FOXP3/XDH/CDK1/CDH2/PPARG/CXCR4/ANXA1/CA9/ATP2C2/APLNR/PITX2/CSTA/LIF/IFNG/SERPINE1/MMP2/VASP/TGM2/ADAM9/ITGB5/GBX2/COL4A1/PCK1/MET/CTSB/ACTB/TNF/CAV1/IVL/FGF2/CES1/IL18/FOXE3/IL1B/TGFB2/ITGA5/CSF1R/PDE4D/BMP6/MAF/GPX1/SNAI1/HIF1A/SLC39A2/COL2A1/AGT/MAP1B/LMO4/ITGB3/STAT1/PGK1/TGFB1/TAGLN/BMPR2/PROM1/ACVR1/NRG1/PFN1/ICAM1/IL10/PDGFB/BAX/ITGAV/SOD1/C…
GO:0050729	BP	GO:0050729	positive regulation of inflammatory response	50	0.59146	1.75771	0.000176426	0.0124373	0.0108879	401	tags=58%, list=25%, signal=45%	IDO1/PTGS2/CD28/LTA/LGALS1/PIK3CG/TREM2/HTR2A/IFNG/SERPINE1/CCL3/PLA2G2A/IL23A/GRN/TNF/NLRP3/IL2/IL18/SNCA/IL1B/IL6/TLR4/TTBK1/AGT/CASP1/LDLR/TGFB1/CCR2/CX3CL1
GO:0040012	BP	GO:0040012	regulation of locomotion	236	0.428914	1.53634	0.000178621	0.0124373	0.0108879	408	tags=41%, list=25%, signal=36%	CCL18/CSF2/MMP9/SERPINB3/COL3A1/TERT/TNFAIP6/CCL20/FN1/PTGS2/IL1A/CATSPER1/CCL19/ITGA2/PLAU/CXCL10/MMP3/CCL7/CXCR3/PPARG/CXCR4/APOE/CCL5/ANXA1/F2R/CCL21/TIMP1/SPN/PIK3CG/TREM2/CCL8/ITGA4/FERMT3/IFNG/SERPINE1/MMP2/FUT3/CYP1B1/ADAM9/FUT7/CD69/MET/IL4/CCL3/CXCL8/IL23A/HMOX1/SELP/GRN/P2RY6/TNF/CAV1/LMNA/JUP/LRP1/FGF2/CCL4/THBS1/FGF23/GP1BA/SNCA/MCU/C5AR1/IL1B/CD9/GNAI2/TGFB2/ITGA5/CSF1R/ADORA3/AKAP12…
GO:2000145	BP	GO:2000145	regulation of cell motility	229	0.435758	1.5573	0.000188932	0.0129161	0.011307	408	tags=41%, list=25%, signal=36%	CCL18/CSF2/MMP9/SERPINB3/COL3A1/TERT/TNFAIP6/CCL20/FN1/PTGS2/IL1A/CATSPER1/CCL19/ITGA2/PLAU/CXCL10/MMP3/CCL7/CXCR3/PPARG/CXCR4/APOE/CCL5/ANXA1/F2R/CCL21/TIMP1/SPN/PIK3CG/TREM2/CCL8/ITGA4/FERMT3/IFNG/SERPINE1/MMP2/FUT3/CYP1B1/ADAM9/FUT7/CD69/MET/IL4/CCL3/CXCL8/IL23A/HMOX1/SELP/GRN/P2RY6/TNF/CAV1/LMNA/JUP/LRP1/FGF2/CCL4/THBS1/FGF23/GP1BA/MCU/C5AR1/IL1B/CD9/GNAI2/TGFB2/ITGA5/CSF1R/ADORA3/AKAP12/MAPK…
GO:0006473	BP	GO:0006473	protein acetylation	11	-0.849003	-2.16581	0.000217747	0.0146201	0.0127988	2	tags=18%, list=0%, signal=18%	KAT5/XBP1
GO:0170040	BP	GO:0170040	GO:0170040	26	-0.658497	-1.98108	0.000242659	0.0151676	0.013278	187	tags=31%, list=12%, signal=28%	ARG1/GPT/PAH/NOS1/AASS/GPT2/GLS2/CBS
GO:0042093	BP	GO:0042093	T-helper cell differentiation	17	0.757538	1.87107	0.000248612	0.0151676	0.013278	328	tags=71%, list=20%, signal=57%	CCL19/FOXP3/HLA-DRB1/ANXA1/SPN/LGALS1/CD69/IL23A/NLRP3/IL2/IL18/IL6
GO:0050920	BP	GO:0050920	regulation of chemotaxis	58	0.571631	1.75819	0.000241	0.0151676	0.013278	440	tags=53%, list=27%, signal=40%	TNFAIP6/CCL19/ITGA2/CXCL10/CCL7/CXCR3/CXCR4/CCL5/CCL21/TREM2/SERPINE1/MET/CCL3/CXCL8/IL23A/FGF2/CCL4/THBS1/MCU/C5AR1/CSF1R/MAPK3/IL6/PDGFRB/TGFB1/BMPR2/CCR2/TMSB4X/ADAM10/PDGFB/LYN
GO:0097529	BP	GO:0097529	myeloid leukocyte migration	82	0.52337	1.69236	0.00023619	0.0151676	0.013278	417	tags=48%, list=26%, signal=37%	CCL18/TNFAIP6/IL1A/CCL19/CXCL10/CCL7/CCL5/ANXA1/CCL21/PIK3CG/TREM2/CCL8/ITGB2/SERPINE1/MMP2/FUT7/CCL3/CXCL8/IL23A/CXCL3/ITGA1/CCL4/THBS1/CXCR2/MCU/C5AR1/IL1B/CD9/TGFB2/CSF1R/MAPK3/IL6/ITGA9/CXCL6/CCL23/CTSG/CCR2/CX3CL1/PDGFB
GO:0022409	BP	GO:0022409	positive regulation of cell-cell adhesion	96	0.51005	1.68624	0.000249127	0.0151676	0.013278	401	tags=52%, list=25%, signal=42%	CD70/IL2RA/IL1A/PLAUR/CCL19/FOXP3/HLA-DQB1/HLA-DRB1/HLA-DRB5/CD28/LCK/CD40LG/CCL5/ANXA1/CCL21/CD27/CD55/SPN/LGALS1/HTR2A/ITGA4/ITGB2/IFNG/FUT3/FUT7/PCK1/IL4/CD4/IL23A/ACTB/B2M/SELP/TNF/CAV1/NLRP3/TNFSF13B/IL2/IL18/GP1BA/IL1B/IL6/IL7/PNP/TGFB1/ZAP70/CTSG/SELE/CCR2/FYN/CX3CL1
GO:0044419	BP	GO:0044419	biological process involved in interspecies interaction between organisms	378	0.389843	1.42952	0.000250104	0.0151676	0.013278	428	tags=37%, list=26%, signal=35%	CCL18/CSF2/SFN/MMP9/CHIT1/SERPINB3/IDO1/MS4A1/NQO1/CCL20/FN1/PTGS2/IL1A/NTS/LCN2/KYNU/UGT1A1/CCL19/ITGA2/CXCL10/FOXP3/ITGB6/MMP3/CDK1/OAS2/HLA-DRB1/OAS1/CCL7/LCK/SELPLG/PPARG/CXCR4/APOE/CCL5/ANXA1/F2R/CCL21/CD55/PENK/LTA/SPN/LGALS1/PIK3CG/TREM2/CCL8/HTR2A/C1QA/AHR/IFNG/SERPINE1/TYROBP/AXL/ADAM9/C1QC/C1QB/ITGB5/ISG20/APCS/PCK1/CCL3/CD4/CARD16/CXCL8/HVCN1/HCK/PLA2G2A/IL23A/CTSB/CXCL3/CCR5/B2M/FASLG…
GO:0070098	BP	GO:0070098	chemokine-mediated signaling pathway	35	0.631325	1.78436	0.00026176	0.0155923	0.0136498	468	tags=74%, list=29%, signal=54%	CCL18/CCL20/CCL19/CXCL10/CCL7/CCR3/CXCR3/CXCR4/CCL5/CCL21/TREM2/CCL8/CCL3/CXCL8/CXCL3/CCR5/CCL4/CXCR2/HIF1A/CXCL6/CCL23/CCR2/CX3CL1/LYN/EDN1/ACKR1
GO:0002706	BP	GO:0002706	regulation of lymphocyte mediated immunity	44	0.589375	1.71594	0.000265401	0.0155923	0.0136498	423	tags=55%, list=26%, signal=41%	FOXP3/HLA-DRB1/CD28/CD55/LTA/SPN/TREM2/AHR/PDCD1/FUT7/IL4/IL23A/B2M/TNF/NLRP3/TNFRSF1B/IL2/IL18/IL1B/IL6/TGFB1/CCR2/IL10/TRAF2
GO:0050793	BP	GO:0050793	regulation of developmental process	412	0.386235	1.41624	0.000295993	0.0171221	0.014989	417	tags=35%, list=26%, signal=35%	CSF2/SFN/MMP9/SULT1E1/ST8SIA2/ADAM12/SERPINB3/COMP/IL2RA/TFAP2A/TERT/TNFAIP6/FN1/PTGS2/IL1A/VCAN/CCL19/CXCL10/FOXP3/PTHLH/XDH/CDK1/OAS2/HLA-DRB1/CCL7/CTLA4/CD28/CCR3/CXCR3/PPARG/HK2/CXCR4/GPR68/APOE/NEFL/ANXA1/CD27/RUNX2/LTA/LGALS1/PIK3CG/TREM2/APLNR/HTR2A/MME/LIF/ITGB2/PKM/IFNG/SERPINE1/PRKCB/TYROBP/AXL/TGM2/PDCD1/CYP1B1/ADAM9/C1QC/GBX2/CD69/APCS/PCK1/IL4/CCL3/MYH14/CD4/CXCL8/HCK/PLA2G2A/IL23A/H…
GO:0048598	BP	GO:0048598	embryonic morphogenesis	76	0.528895	1.69055	0.000325055	0.0185183	0.0162113	544	tags=55%, list=33%, signal=39%	MMP9/IL1RN/TFAP2A/FN1/ITGA2/RUNX2/APLNR/ITGA4/ITGB2/MMP2/VASP/ITGB5/GBX2/FGF2/TGFB2/ITGA5/MAPK3/SNAI1/CACNA1C/HIF1A/COL2A1/MFAP2/LMO4/ITGB3/TGFB1/BMPR2/TH/ACVR1/PFN1/TGFBR1/IL10/BAX/ITGAV/SOD1/EDN1/SLC39A1/PSEN1/TXNRD1/APOA1/IGF2/GRB2/CASP3
GO:0033627	BP	GO:0033627	cell adhesion mediated by integrin	36	0.629682	1.77869	0.000340967	0.0191349	0.0167511	469	tags=69%, list=29%, signal=51%	ITGA2/PLAU/ITGB6/CCL5/CCL21/PIK3CG/ITGA4/LIF/ITGB2/FERMT3/SERPINE1/CYP1B1/ADAM9/ITGB5/ITGAL/ITGAM/ITGA1/TGFB2/ITGA5/ITGA9/ITGB3/ICAM1/LYN/ITGAV/VCAM1
GO:0051209	BP	GO:0051209	release of sequestered calcium ion into cytosol	46	0.592155	1.73842	0.00038156	0.0202065	0.0176892	464	tags=63%, list=29%, signal=46%	CCL19/CXCL10/LCK/CXCR3/F2R/CCL21/APLNR/HTR2A/CCL3/CCR5/FASLG/P2RY6/SLC8A1/FGF2/PLCB4/GP1BA/SNCA/JPH3/PDE4D/CYBA/TRPM2/CACNA1C/ITGB3/TGFB1/CX3CL1/F2/BAX/LYN/DRD2
GO:0051282	BP	GO:0051282	regulation of sequestering of calcium ion	46	0.592155	1.73842	0.00038156	0.0202065	0.0176892	464	tags=63%, list=29%, signal=46%	CCL19/CXCL10/LCK/CXCR3/F2R/CCL21/APLNR/HTR2A/CCL3/CCR5/FASLG/P2RY6/SLC8A1/FGF2/PLCB4/GP1BA/SNCA/JPH3/PDE4D/CYBA/TRPM2/CACNA1C/ITGB3/TGFB1/CX3CL1/F2/BAX/LYN/DRD2
GO:0051283	BP	GO:0051283	negative regulation of sequestering of calcium ion	46	0.592155	1.73842	0.00038156	0.0202065	0.0176892	464	tags=63%, list=29%, signal=46%	CCL19/CXCL10/LCK/CXCR3/F2R/CCL21/APLNR/HTR2A/CCL3/CCR5/FASLG/P2RY6/SLC8A1/FGF2/PLCB4/GP1BA/SNCA/JPH3/PDE4D/CYBA/TRPM2/CACNA1C/ITGB3/TGFB1/CX3CL1/F2/BAX/LYN/DRD2
GO:0007159	BP	GO:0007159	leukocyte cell-cell adhesion	121	0.47832	1.62706	0.000366639	0.0202065	0.0176892	400	tags=47%, list=25%, signal=38%	CD70/IDO1/IL2RA/IL1A/CCL19/FOXP3/HLA-DQB1/HLA-DRB1/SELL/HLA-DRB5/CTLA4/CD28/LCK/SELPLG/CD40LG/CCL5/ANXA1/CCL21/CD27/CD55/SPN/LGALS1/ITGA4/ITGB2/FERMT3/IFNG/PDCD1/FUT7/CD69/ITGAL/PCK1/IL4/CD4/IL23A/ACTB/B2M/SELP/ASS1/TNF/CAV1/NLRP3/TNFSF13B/IL2/IL18/GP1BA/IL1B/ITGA5/IL6/IL7/PNP/TGFB1/ZAP70/CTSG/ICAM1/SELE/CCR2/FYN
GO:0043588	BP	GO:0043588	skin development	41	0.615265	1.77374	0.000393035	0.0202705	0.0177452	349	tags=46%, list=21%, signal=37%	SFN/COMP/COL3A1/COL1A2/IL1A/ITGA2/ITGB6/ANXA1/CSTA/ADAM9/MET/TNF/TNFSF13B/IVL/JUP/IL18/TGFB2/SNAI1/SLC39A2
GO:0043207	BP	GO:0043207	response to external biotic stimulus	331	0.396547	1.44778	0.000393549	0.0202705	0.0177452	428	tags=38%, list=26%, signal=35%	CCL18/CSF2/SFN/MMP9/CHIT1/IDO1/MS4A1/NQO1/CCL20/PTGS2/IL1A/NTS/LCN2/KYNU/UGT1A1/CCL19/CXCL10/FOXP3/ITGB6/MMP3/OAS2/HLA-DRB1/OAS1/CCL7/LCK/PPARG/CXCR4/APOE/CCL5/ANXA1/F2R/CCL21/CD55/PENK/LTA/SPN/PIK3CG/GRP/TREM2/CCL8/C1QA/AHR/IFNG/SERPINE1/TYROBP/AXL/ADAM9/C1QC/C1QB/ISG20/APCS/PCK1/CCL3/CD4/CARD16/CXCL8/HVCN1/HCK/PLA2G2A/IL23A/CXCL3/CCR5/B2M/FASLG/NOS2/CFL1/ACP5/BIRC3/SELP/GRN/GAPDH/ASS1/CFH/TNF/C…
GO:0046631	BP	GO:0046631	α-β T cell activation	39	0.616125	1.76812	0.000426388	0.0216651	0.0189661	397	tags=54%, list=24%, signal=42%	IL2RA/CCL19/FOXP3/HLA-DRB1/CD28/ANXA1/CD55/SPN/LGALS1/IFNG/FUT7/CD69/IL23A/NLRP3/IL2/IL18/IL6/PNP/ZAP70/CCR2/CLEC4A
GO:0045785	BP	GO:0045785	positive regulation of cell adhesion	133	0.471219	1.61601	0.000438123	0.0217568	0.0190463	417	tags=48%, list=26%, signal=39%	SFN/CD70/IL2RA/FN1/IL1A/IBSP/PLAUR/CCL19/ITGA2/FOXP3/HLA-DQB1/HLA-DRB1/HLA-DRB5/CD28/LCK/CD40LG/CCL5/ANXA1/CCL21/CD27/CD55/SPN/LGALS1/HTR2A/ITGA4/LIF/ITGB2/IFNG/FUT3/TGM2/ADAM9/FUT7/PCK1/IL4/CD4/IL23A/ACTB/B2M/SELP/TNF/CAV1/NLRP3/TNFSF13B/JUP/IL2/IL18/GP1BA/IL1B/TGFB2/ITGA5/IL6/IL7/PNP/ITGB3/TGFB1/ZAP70/CTSG/NRG1/SELE/CCR2/FYN/CX3CL1/IL10/PDGFB
GO:0038023	MF	GO:0038023	signaling receptor activity	170	0.448653	1.57066	0.000445551	0.0217568	0.0190463	468	tags=46%, list=29%, signal=37%	HCAR1/IL2RA/IL1RAPL2/PLAUR/GUCY2C/HRH1/ITGA2/HLA-DQB1/HLA-DRB1/CD28/CCR3/CXCR3/NPR3/PPARG/CXCR4/GABRD/GPR68/CYSLTR2/F2R/CD27/SPN/TREM2/APLNR/HTR2A/HCAR2/AHR/ITGA4/ITGB2/CALCR/AXL/PDCD1/ANTXR2/CD69/ITGAL/MET/CD4/CCR5/DNER/P2RY6/FPR1/GABRG3/ALK/TSPO/TNFRSF1B/LRP1/CXCR2/CD8A/CD14/GP1BA/C5AR1/GRM7/ITGA5/GABRG2/CSF1R/ADORA3/HCAR3/SORL1/TLR4/GRID2/PDGFRB/ITGB3/BMPR2/GUCY2D/NOTCH3/ACVR1/ICAM1/SELE/CCR2/…
GO:0060089	MF	GO:0060089	molecular transducer activity	170	0.448653	1.57066	0.000445551	0.0217568	0.0190463	468	tags=46%, list=29%, signal=37%	HCAR1/IL2RA/IL1RAPL2/PLAUR/GUCY2C/HRH1/ITGA2/HLA-DQB1/HLA-DRB1/CD28/CCR3/CXCR3/NPR3/PPARG/CXCR4/GABRD/GPR68/CYSLTR2/F2R/CD27/SPN/TREM2/APLNR/HTR2A/HCAR2/AHR/ITGA4/ITGB2/CALCR/AXL/PDCD1/ANTXR2/CD69/ITGAL/MET/CD4/CCR5/DNER/P2RY6/FPR1/GABRG3/ALK/TSPO/TNFRSF1B/LRP1/CXCR2/CD8A/CD14/GP1BA/C5AR1/GRM7/ITGA5/GABRG2/CSF1R/ADORA3/HCAR3/SORL1/TLR4/GRID2/PDGFRB/ITGB3/BMPR2/GUCY2D/NOTCH3/ACVR1/ICAM1/SELE/CCR2/…
GO:0009607	BP	GO:0009607	response to biotic stimulus	340	0.392508	1.43184	0.000463527	0.0223444	0.0195607	428	tags=37%, list=26%, signal=35%	CCL18/CSF2/SFN/MMP9/CHIT1/IDO1/MS4A1/NQO1/CCL20/PTGS2/IL1A/NTS/LCN2/KYNU/UGT1A1/CCL19/CXCL10/FOXP3/ITGB6/MMP3/OAS2/HLA-DRB1/OAS1/CCL7/LCK/PPARG/CXCR4/APOE/CCL5/ANXA1/F2R/CCL21/CD55/PENK/LTA/SPN/PIK3CG/GRP/TREM2/CCL8/C1QA/AHR/IFNG/SERPINE1/TYROBP/AXL/PDCD1/ADAM9/C1QC/C1QB/ISG20/APCS/PCK1/CCL3/CD4/CARD16/CXCL8/HVCN1/HCK/PLA2G2A/IL23A/CXCL3/CCR5/B2M/FASLG/NOS2/CFL1/ACP5/BIRC3/SELP/GRN/GAPDH/ASS1/CFH…
GO:0070661	BP	GO:0070661	leukocyte proliferation	102	0.495985	1.65069	0.000472868	0.0225061	0.0197023	440	tags=47%, list=27%, signal=37%	CSF2/CD70/IDO1/MS4A1/IL2RA/IL1A/CCL19/FOXP3/HLA-DRB1/CTLA4/CD28/NPR3/CD40LG/CCL5/ANXA1/CD55/SPN/PIK3CG/TREM2/CCL8/AHR/TYROBP/IL4/IL23A/CD38/TNFSF13B/TNFRSF1B/IL2/IL18/IL1B/CSF1R/MAPK3/IL6/TLR4/IL7/PNP/TGFB1/ZAP70/HELLS/CCR2/FYN/CX3CL1/ACE/IL10/BAX/GSTP1/PRNP/LYN
GO:2000516	BP	GO:2000516	positive regulation of CD4-positive, α-β T cell activation	11	0.808159	1.79686	0.000537213	0.0232175	0.020325	284	tags=91%, list=17%, signal=76%	CCL19/FOXP3/HLA-DRB1/CD28/ANXA1/CD55/IFNG/IL23A/NLRP3/IL18
GO:0030198	BP	GO:0030198	extracellular matrix organization	63	0.544919	1.68875	0.00052203	0.0232175	0.020325	408	tags=46%, list=25%, signal=36%	MMP1/NOX1/MMP9/COMP/COL3A1/COL1A2/MMP10/IBSP/ITGA2/MMP3/PPARG/PXDN/MMP2/CYP1B1/COL4A1/ADAMTSL1/TNF/CAV1/TNFRSF1B/LRP1/TGFB2/IL6/COL2A1/AGT/ITGB3/TGFB1/CTSG/TGFBR1/ADAM10
GO:0043062	BP	GO:0043062	extracellular structure organization	63	0.544919	1.68875	0.00052203	0.0232175	0.020325	408	tags=46%, list=25%, signal=36%	MMP1/NOX1/MMP9/COMP/COL3A1/COL1A2/MMP10/IBSP/ITGA2/MMP3/PPARG/PXDN/MMP2/CYP1B1/COL4A1/ADAMTSL1/TNF/CAV1/TNFRSF1B/LRP1/TGFB2/IL6/COL2A1/AGT/ITGB3/TGFB1/CTSG/TGFBR1/ADAM10
GO:0045229	BP	GO:0045229	external encapsulating structure organization	63	0.544919	1.68875	0.00052203	0.0232175	0.020325	408	tags=46%, list=25%, signal=36%	MMP1/NOX1/MMP9/COMP/COL3A1/COL1A2/MMP10/IBSP/ITGA2/MMP3/PPARG/PXDN/MMP2/CYP1B1/COL4A1/ADAMTSL1/TNF/CAV1/TNFRSF1B/LRP1/TGFB2/IL6/COL2A1/AGT/ITGB3/TGFB1/CTSG/TGFBR1/ADAM10
GO:0050727	BP	GO:0050727	regulation of inflammatory response	116	0.477873	1.61983	0.000517886	0.0232175	0.020325	424	tags=47%, list=26%, signal=38%	MMP9/IDO1/IL2RA/TNFAIP6/PTGS2/FOXP3/MMP3/HLA-DRB1/CD28/PPARG/APOE/CCL5/ANXA1/LTA/SPN/LGALS1/PIK3CG/TREM2/HTR2A/AHR/IFNG/SERPINE1/FUT7/APCS/IL4/CCL3/CARD16/HCK/PLA2G2A/IL23A/ACP5/BIRC3/GRN/TNF/NLRP3/TNFRSF1B/IL2/IL18/SNCA/IL1B/GPX1/IL6/TLR4/TTBK1/AGT/CASP1/LDLR/TGFB1/SELE/CCR2/TMSB4X/FYN/CX3CL1/IL10/GSTP1
GO:0032103	BP	GO:0032103	positive regulation of response to external stimulus	157	0.450934	1.5697	0.000534397	0.0232175	0.020325	417	tags=41%, list=26%, signal=34%	IDO1/PLAT/PTGS2/CCL19/ITGA2/PLAU/CXCL10/OAS1/CCL7/CD28/CXCR3/CXCR4/CCL5/CCL21/LTA/LGALS1/PIK3CG/TREM2/HTR2A/IFNG/SERPINE1/TYROBP/MET/CCL3/CXCL8/HCK/PLA2G2A/IL23A/BIRC3/GRN/TNF/CAV1/NLRP3/IL2/FGF2/CCL4/THBS1/IL18/CD14/SNCA/MCU/C5AR1/IL1B/CSF1R/BMP6/CYBA/MAPK3/IL6/TLR4/PDGFRB/TTBK1/AGT/CASP1/LTF/LDLR/TGFB1/BMPR2/CCR2/TMSB4X/FYN/CX3CL1/ADAM10/F2/PDGFB
GO:0033993	BP	GO:0033993	response to lipid	261	0.407998	1.47107	0.000531279	0.0232175	0.020325	434	tags=38%, list=27%, signal=33%	CSF2/MMP9/IL1RN/IDO1/CYP26A1/NQO1/PTGS2/IL1A/UGT1A1/CCL19/ITGA2/CXCL10/FOXP3/MMP3/PPARG/NEFL/ANXA1/F2R/CCL21/CD55/PENK/CA9/LTA/TREM2/AHR/SERPINE1/UCP2/PRKCB/MMP2/CALCR/AXL/CYP1B1/ADAM9/PCK1/CCNA2/MAP4K1/CCL3/CARD16/CXCL8/HCK/CXCL3/CCR5/ATP1A3/B2M/FASLG/NOS2/ACP5/SELP/CD38/P2RY6/SCD/ASS1/TNF/OXT/CAV1/ITGAM/NLRP3/TSPO/TNFRSF1B/MAOB/THBS1/CES1/ADCY2/FGF23/CD14/SNCA/IL1B/SLC34A1/TGFB2/BMP6/AKAP12/GPX…
GO:0001775	BP	GO:0001775	cell activation	263	0.406991	1.46819	0.000511948	0.0232175	0.020325	423	tags=42%, list=26%, signal=37%	CSF2/CD70/IDO1/COMP/MS4A1/COL3A1/IL2RA/FN1/PLAT/IL1A/CCL19/CXCL10/FOXP3/HLA-DQB1/ITGB6/HLA-DRB1/HLA-DRB5/CTLA4/CD28/LCK/SELPLG/CD40LG/APOE/CCL5/ANXA1/F2R/CCL21/CD27/CD55/RUNX2/SPN/LGALS1/PIK3CG/GRP/TREM2/HTR2A/C1QA/AHR/ITGA4/ITGB2/FERMT3/IFNG/PRKCB/TYROBP/AXL/PDCD1/ADAM9/FUT7/CD69/ITGAL/PCK1/IL4/CCL3/CD4/CXCL8/PLA2G2A/IL23A/ACTB/B2M/SELP/GRN/CD38/TNF/CAV1/ITGAM/NLRP3/TNFSF13B/TNFRSF1B/LRP1/IL2/IF…
GO:0045622	BP	GO:0045622	regulation of T-helper cell differentiation	10	0.830235	1.78654	0.000573425	0.0245009	0.0214486	284	tags=100%, list=17%, signal=83%	CCL19/FOXP3/HLA-DRB1/ANXA1/LGALS1/CD69/IL23A/NLRP3/IL2/IL18
GO:0001819	BP	GO:0001819	positive regulation of cytokine production	125	0.466883	1.59377	0.000580578	0.0245278	0.0214721	464	tags=50%, list=29%, signal=38%	NOX1/CSF2/IDO1/PTGS2/IL1A/CCL19/FOXP3/OAS2/OAS1/CD28/CD40LG/ANXA1/F2R/CD55/LTA/SPN/PIK3CG/TREM2/HTR2A/IFNG/SERPINE1/TYROBP/CYP1B1/IL4/CCL3/CD4/IL23A/HMOX1/B2M/NOS2/GAPDH/TNF/NLRP3/IL2/THBS1/IL18/CD14/C5AR1/IL1B/CSF1R/PDE4D/CYBA/AKAP12/IL6/SORL1/TLR4/IL7/HIF1A/PNP/AGT/CASP1/STAT1/TGFB1/CCR2/CX3CL1/IL10/TRAF2/APOA2/SOD1/BRCA1/KIT/DRD2
GO:0002521	BP	GO:0002521	leukocyte differentiation	146	0.447359	1.55089	0.000595777	0.0248902	0.0217894	375	tags=38%, list=23%, signal=32%	CSF2/MMP9/MS4A1/IL2RA/TNFAIP6/IL1A/CCL19/FOXP3/ITGB6/HLA-DRB1/CTLA4/CD28/LCK/PPARG/GPR68/CD40LG/ANXA1/CD27/RUNX2/SPN/LGALS1/TREM2/ITGA4/LIF/IFNG/UCP2/TYROBP/CALCR/AXL/C1QC/FUT7/CD69/APCS/PCK1/IL4/CCL3/CD4/IL23A/ACTB/B2M/TNF/NLRP3/TNFSF13B/IL2/IL18/CD8A/IL1B/CSF1R/IL6/TRPM2/TLR4/IL7/PNP/LTF/TGFB1/ZAP70
GO:0098636	CC	GO:0098636	protein complex involved in cell adhesion	25	0.667996	1.7787	0.000611603	0.024996	0.021882	360	tags=64%, list=22%, signal=51%	PLAUR/ITGA2/PLAU/ITGB6/CTLA4/CD28/LGALS1/ITGA4/ITGB2/ITGB5/ITGAL/ITGAM/ITGA1/ITGA5/ITGA9/ITGB3
GO:0051208	BP	GO:0051208	sequestering of calcium ion	50	0.565526	1.68063	0.000610066	0.024996	0.021882	477	tags=60%, list=29%, signal=44%	CCL19/CXCL10/LCK/CXCR3/F2R/CCL21/APLNR/HTR2A/CCL3/CCR5/FASLG/P2RY6/SLC8A1/FGF2/PLCB4/GP1BA/SNCA/JPH3/PDE4D/CYBA/TRPM2/CACNA1C/ITGB3/TGFB1/CX3CL1/F2/BAX/LYN/DRD2/PSEN1
GO:0046634	BP	GO:0046634	regulation of α-β T cell activation	27	0.665123	1.79354	0.000637833	0.0255302	0.0223496	396	tags=63%, list=24%, signal=48%	IL2RA/CCL19/FOXP3/HLA-DRB1/CD28/ANXA1/CD55/LGALS1/IFNG/CD69/IL23A/NLRP3/IL2/IL18/PNP/ZAP70/CCR2
GO:1990868	BP	GO:1990868	response to chemokine	37	0.61551	1.75242	0.000646688	0.0255302	0.0223496	468	tags=70%, list=29%, signal=51%	CCL18/CCL20/CCL19/CXCL10/CCL7/CCR3/CXCR3/CXCR4/CCL5/CCL21/TREM2/CCL8/CCL3/CXCL8/CXCL3/CCR5/CCL4/CXCR2/HIF1A/CXCL6/CCL23/CCR2/CX3CL1/LYN/EDN1/ACKR1
GO:1990869	BP	GO:1990869	cellular response to chemokine	37	0.61551	1.75242	0.000646688	0.0255302	0.0223496	468	tags=70%, list=29%, signal=51%	CCL18/CCL20/CCL19/CXCL10/CCL7/CCR3/CXCR3/CXCR4/CCL5/CCL21/TREM2/CCL8/CCL3/CXCL8/CXCL3/CCR5/CCL4/CXCR2/HIF1A/CXCL6/CCL23/CCR2/CX3CL1/LYN/EDN1/ACKR1
GO:1903039	BP	GO:1903039	positive regulation of leukocyte cell-cell adhesion	86	0.499947	1.63267	0.000651834	0.0255302	0.0223496	400	tags=52%, list=25%, signal=42%	CD70/IL2RA/IL1A/CCL19/FOXP3/HLA-DQB1/HLA-DRB1/HLA-DRB5/CD28/LCK/CD40LG/CCL5/ANXA1/CCL21/CD27/CD55/SPN/LGALS1/ITGA4/ITGB2/IFNG/FUT7/PCK1/IL4/CD4/IL23A/ACTB/B2M/SELP/TNF/CAV1/NLRP3/TNFSF13B/IL2/IL18/GP1BA/IL1B/IL6/IL7/PNP/TGFB1/ZAP70/SELE/CCR2/FYN
GO:2000147	BP	GO:2000147	positive regulation of cell motility	174	0.43303	1.51576	0.000692933	0.0268601	0.0235139	408	tags=43%, list=25%, signal=36%	CCL18/CSF2/MMP9/SERPINB3/TERT/TNFAIP6/CCL20/FN1/PTGS2/IL1A/CCL19/ITGA2/PLAU/CXCL10/CCL7/CXCR4/CCL5/ANXA1/F2R/CCL21/SPN/PIK3CG/TREM2/CCL8/ITGA4/FERMT3/IFNG/SERPINE1/MMP2/CYP1B1/ADAM9/FUT7/MET/IL4/CCL3/CXCL8/IL23A/HMOX1/SELP/GRN/P2RY6/TNF/CAV1/FGF2/CCL4/THBS1/MCU/C5AR1/IL1B/GNAI2/TGFB2/ITGA5/CSF1R/AKAP12/MAPK3/SNAI1/IL6/TLR4/HIF1A/PDGFRB/ANXA3/AGT/ITGB3/CCL23/TGFB1/BMPR2/ACVR1/PFN1/ICAM1/SELE/CCR2/…
GO:0007267	BP	GO:0007267	cell-cell signaling	293	0.395344	1.43349	0.000713484	0.0273745	0.0239642	498	tags=42%, list=31%, signal=36%	CCL18/IL1RN/SERPINB3/NQO1/TNFAIP6/CCL20/CALB2/PLAT/PTGS2/IL1A/HRH1/CXCL10/PTHLH/HLA-DRB1/CCL7/SNCAIP/SLC24A2/PPARG/GABRD/GPR68/APOE/NEFL/CCL5/ANXA1/F2R/CCL21/PENK/LTA/GRP/SLC16A1/SNCG/CCL8/HTR2A/C1QA/MME/HCAR2/LIF/ITGB2/IFNG/CACNA1E/UCP2/PRKCB/PVALB/TYROBP/HCRT/TGM2/GAL3ST4/MET/CCL3/OMP/CCR5/SYT1/FASLG/NOS2/CD38/BDNF/TNF/OXT/GABRG3/TSPO/TNFRSF1B/IL2/FGF2/CCL4/HCN2/MAOB/IL18/FGF23/SNCA/MCU/IL1B/GR…
GO:0051707	BP	GO:0051707	response to other organism	330	0.39383	1.4377	0.000781733	0.0296901	0.0259913	428	tags=38%, list=26%, signal=35%	CCL18/CSF2/SFN/MMP9/CHIT1/IDO1/MS4A1/NQO1/CCL20/PTGS2/IL1A/NTS/LCN2/KYNU/UGT1A1/CCL19/CXCL10/FOXP3/ITGB6/MMP3/OAS2/HLA-DRB1/OAS1/CCL7/LCK/PPARG/CXCR4/APOE/CCL5/ANXA1/F2R/CCL21/CD55/PENK/LTA/SPN/PIK3CG/TREM2/CCL8/C1QA/AHR/IFNG/SERPINE1/TYROBP/AXL/ADAM9/C1QC/C1QB/ISG20/APCS/PCK1/CCL3/CD4/CARD16/CXCL8/HVCN1/HCK/PLA2G2A/IL23A/CXCL3/CCR5/B2M/FASLG/NOS2/CFL1/ACP5/BIRC3/SELP/GRN/GAPDH/ASS1/CFH/TNF/CAV1/…
GO:0140375	MF	GO:0140375	immune receptor activity	17	0.736819	1.8199	0.000831779	0.030364	0.0265812	296	tags=71%, list=18%, signal=58%	IL2RA/IL1RAPL2/HLA-DQB1/HLA-DRB1/CCR3/CXCR3/CXCR4/CD4/CCR5/FPR1/CXCR2/C5AR1
GO:0070141	BP	GO:0070141	response to UV-A	10	0.82152	1.76778	0.000826949	0.030364	0.0265812	164	tags=60%, list=10%, signal=54%	MMP1/MMP9/MMP3/TIMP1/MME/MMP2
GO:0008284	BP	GO:0008284	positive regulation of cell population proliferation	228	0.410282	1.46752	0.000809779	0.030364	0.0265812	417	tags=40%, list=26%, signal=35%	NOX1/CSF2/MMP9/CD70/SERPINB3/COMP/IL2RA/TERT/FN1/PTGS2/IL1A/VCAN/CCL19/ITGA2/CXCL10/FOXP3/PTHLH/CDK1/CD28/CCR3/BIRC5/CXCR3/CD40LG/CCL5/ANXA1/F2R/TIMP1/CD55/RUNX2/LTA/SPN/APLNR/HTR2A/PITX2/FOXM1/ITGA4/LIF/IFNG/MMP2/CCNB1/CCNA2/IL4/HCK/IL23A/HMOX1/ACTB/FASLG/GRN/CD38/P2RY6/TNF/TSPO/TNFSF13B/IL2/FGF2/THBS1/CXCR2/PITX3/IL18/FGF23/FOXE3/C5AR1/IL1B/GNAI2/TGFB2/CSF1R/BMP6/S100B/MAPK3/IL6/TLR4/IL7/HIF1A/…
GO:0045595	BP	GO:0045595	regulation of cell differentiation	280	0.406429	1.46737	0.000827928	0.030364	0.0265812	417	tags=37%, list=26%, signal=33%	CSF2/SFN/MMP9/SULT1E1/SERPINB3/IL2RA/TFAP2A/TERT/TNFAIP6/FN1/PTGS2/IL1A/VCAN/CCL19/CXCL10/FOXP3/PTHLH/XDH/CDK1/HLA-DRB1/CTLA4/CD28/PPARG/CXCR4/GPR68/NEFL/ANXA1/CD27/RUNX2/LTA/LGALS1/TREM2/HTR2A/MME/LIF/IFNG/SERPINE1/TYROBP/AXL/TGM2/C1QC/CD69/APCS/PCK1/IL4/CCL3/CD4/PLA2G2A/IL23A/ACTB/B2M/GRN/BDNF/TNF/ALK/CAV1/NLRP3/TSPO/TNFRSF1B/IL2/FGF2/PITX3/IL18/FGF23/FOXE3/IL1B/TGFB2/BMP6/MAF/S100B/SNAI1/IL6/S…
GO:0032943	BP	GO:0032943	mononuclear cell proliferation	87	0.489101	1.59821	0.000885006	0.0319964	0.0280102	440	tags=46%, list=27%, signal=35%	CD70/IDO1/MS4A1/IL2RA/IL1A/CCL19/FOXP3/HLA-DRB1/CTLA4/CD28/CD40LG/CCL5/ANXA1/CD55/SPN/PIK3CG/AHR/TYROBP/IL4/IL23A/CD38/TNFSF13B/TNFRSF1B/IL2/IL18/IL1B/IL6/TLR4/IL7/PNP/TGFB1/ZAP70/HELLS/CCR2/FYN/ACE/IL10/BAX/PRNP/LYN
GO:0048514	BP	GO:0048514	blood vessel morphogenesis	158	0.43961	1.52981	0.000906996	0.0324791	0.0284328	421	tags=44%, list=26%, signal=36%	NOX1/ADAM12/COMP/COL3A1/TERT/FN1/PTGS2/IL1A/CXCL10/XDH/CDH2/CCR3/CXCR3/NPR3/PPARG/HK2/CXCR4/APOE/ANXA1/PIK3CG/CCL8/APLNR/PKM/SERPINE1/PRKCB/PXDN/MMP2/TGM2/CYP1B1/GBX2/COL4A1/CXCL8/HMOX1/FASLG/GRN/TNF/CAV1/JUP/LRP1/FGF2/THBS1/IL18/C5AR1/IL1B/TGFB2/ITGA5/GPX1/IL6/HIF1A/PDGFRB/YWHAZ/IGFBP7/APOB/ANXA3/ITGB3/TGFA/STAT1/PGK1/LDLR/TGFB1/NOTCH3/ACVR1/CCR2/FYN/CX3CL1/ACE/TGFBR1/IL10/PDGFB/BAX
GO:0046651	BP	GO:0046651	lymphocyte proliferation	82	0.499496	1.61516	0.000964773	0.0339983	0.0297628	440	tags=48%, list=27%, signal=37%	CD70/IDO1/MS4A1/IL2RA/IL1A/CCL19/FOXP3/HLA-DRB1/CTLA4/CD28/CD40LG/CCL5/ANXA1/CD55/SPN/PIK3CG/AHR/TYROBP/IL4/IL23A/CD38/TNFSF13B/TNFRSF1B/IL2/IL18/IL1B/IL6/TLR4/IL7/PNP/TGFB1/ZAP70/HELLS/CCR2/FYN/IL10/BAX/PRNP/LYN
GO:1903037	BP	GO:1903037	regulation of leukocyte cell-cell adhesion	108	0.474999	1.59814	0.000967504	0.0339983	0.0297628	400	tags=47%, list=25%, signal=38%	CD70/IDO1/IL2RA/IL1A/CCL19/FOXP3/HLA-DQB1/HLA-DRB1/HLA-DRB5/CTLA4/CD28/LCK/CD40LG/CCL5/ANXA1/CCL21/CD27/CD55/SPN/LGALS1/ITGA4/ITGB2/IFNG/PDCD1/FUT7/CD69/PCK1/IL4/CD4/IL23A/ACTB/B2M/SELP/ASS1/TNF/CAV1/NLRP3/TNFSF13B/IL2/IL18/GP1BA/IL1B/IL6/IL7/PNP/TGFB1/ZAP70/CTSG/SELE/CCR2/FYN
GO:0050865	BP	GO:0050865	regulation of cell activation	139	0.456232	1.57135	0.00107624	0.0374689	0.032801	446	tags=53%, list=27%, signal=42%	CD70/IDO1/IL2RA/FN1/IL1A/CCL19/FOXP3/HLA-DQB1/HLA-DRB1/HLA-DRB5/CTLA4/CD28/LCK/CD40LG/APOE/CCL5/ANXA1/CCL21/CD27/CD55/SPN/LGALS1/TREM2/HTR2A/AHR/IFNG/TYROBP/AXL/PDCD1/CD69/PCK1/IL4/CCL3/CD4/PLA2G2A/IL23A/ACTB/B2M/SELP/GRN/CD38/TNF/CAV1/NLRP3/TNFSF13B/TNFRSF1B/IL2/THBS1/IL18/GP1BA/SNCA/IL1B/CD9/IL6/TLR4/IL7/TTBK1/PNP/LMO4/PRKG1/LDLR/TGFB1/ZAP70/CTSG/CCR2/FYN/F2/IL10/PDGFB/PRNP/LYN/CSK/SOD1
GO:0006511	BP	GO:0006511	ubiquitin-dependent protein catabolic process	55	-0.474578	-1.7058	0.00113477	0.0391443	0.0342677	215	tags=35%, list=13%, signal=31%	AKT1/ATXN3/TOLLIP/NAGLU/SQSTM1/EPM2A/CSNK2A2/KAT5/TF/MAPK9/CSNK2B/LRRK2/PINK1/NEDD4L/HSPA1A/OGT/TRIM45/EGF/XBP1
GO:0034976	BP	GO:0034976	response to endoplasmic reticulum stress	57	-0.475601	-1.7155	0.00116594	0.0395409	0.0346149	96	tags=14%, list=6%, signal=14%	HSPA1A/P4HB/EIF2AK3/ERN1/CTH/PDIA2/PIK3R2/XBP1
GO:0050866	BP	GO:0050866	negative regulation of cell activation	48	0.560701	1.66456	0.00117158	0.0395409	0.0346149	440	tags=56%, list=27%, signal=42%	IDO1/IL2RA/FN1/FOXP3/HLA-DRB1/CTLA4/APOE/ANXA1/SPN/LGALS1/TREM2/TYROBP/AXL/PDCD1/CD69/GRN/IL2/CD9/PRKG1/LDLR/TGFB1/CTSG/F2/IL10/PDGFB/PRNP/LYN
GO:0051651	BP	GO:0051651	maintenance of location in cell	73	0.514298	1.63459	0.00117782	0.0395409	0.0346149	440	tags=52%, list=27%, signal=40%	CCL19/CXCL10/LCK/CXCR3/HK2/APOE/F2R/CCL21/APLNR/HTR2A/CCL3/CD4/CCR5/FASLG/P2RY6/SLC8A1/CAV1/TSPO/FGF2/GSN/PLCB4/GP1BA/SNCA/JPH3/PDE4D/CYBA/TRPM2/CACNA1C/SORL1/DBN1/ITGB3/TGFB1/TXN/TMSB4X/CX3CL1/F2/BAX/LYN
GO:0072676	BP	GO:0072676	lymphocyte migration	34	0.602682	1.68468	0.00119669	0.0398192	0.0348585	408	tags=59%, list=25%, signal=45%	CCL20/CXCL10/CCL7/CCL5/CCL21/SPN/PIK3CG/ITGA4/FUT7/CD69/ITGAL/CCL3/CCL4/ITGB3/GNAI1/ZAP70/ICAM1/CCR2/CX3CL1/ADAM10
GO:0042098	BP	GO:0042098	T cell proliferation	59	0.537185	1.65705	0.00124566	0.0406805	0.0356125	439	tags=53%, list=27%, signal=40%	CD70/IDO1/IL2RA/IL1A/CCL19/FOXP3/HLA-DRB1/CTLA4/CD28/CD40LG/CCL5/ANXA1/CD55/SPN/PIK3CG/IL4/IL23A/TNFSF13B/TNFRSF1B/IL2/IL18/IL1B/IL6/PNP/TGFB1/ZAP70/CCR2/FYN/IL10/BAX/PRNP
GO:0050867	BP	GO:0050867	positive regulation of cell activation	95	0.488907	1.61265	0.00124764	0.0406805	0.0356125	345	tags=47%, list=21%, signal=40%	CD70/IL2RA/IL1A/CCL19/FOXP3/HLA-DQB1/HLA-DRB1/HLA-DRB5/CD28/LCK/CD40LG/CCL5/ANXA1/CCL21/CD27/CD55/SPN/LGALS1/TREM2/IFNG/TYROBP/AXL/PCK1/IL4/CCL3/CD4/IL23A/ACTB/B2M/SELP/CD38/TNF/CAV1/NLRP3/TNFSF13B/IL2/THBS1/IL18/GP1BA/IL1B/IL6/TLR4/IL7/TTBK1/PNP
GO:0040017	BP	GO:0040017	positive regulation of locomotion	177	0.433141	1.51764	0.00125504	0.0406805	0.0356125	408	tags=43%, list=25%, signal=36%	CCL18/CSF2/MMP9/SERPINB3/TERT/TNFAIP6/CCL20/FN1/PTGS2/IL1A/CCL19/ITGA2/PLAU/CXCL10/CCL7/CXCR3/CXCR4/CCL5/ANXA1/F2R/CCL21/SPN/PIK3CG/TREM2/CCL8/ITGA4/FERMT3/IFNG/SERPINE1/MMP2/CYP1B1/ADAM9/FUT7/MET/IL4/CCL3/CXCL8/IL23A/HMOX1/SELP/GRN/P2RY6/TNF/CAV1/FGF2/CCL4/THBS1/MCU/C5AR1/IL1B/GNAI2/TGFB2/ITGA5/CSF1R/AKAP12/MAPK3/SNAI1/IL6/TLR4/HIF1A/PDGFRB/ANXA3/AGT/ITGB3/CCL23/TGFB1/BMPR2/ACVR1/PFN1/ICAM1/SELE…
GO:0004888	MF	GO:0004888	transmembrane signaling receptor activity	136	0.447958	1.54217	0.00127879	0.0410962	0.0359764	413	tags=43%, list=25%, signal=35%	HCAR1/IL2RA/IL1RAPL2/HRH1/ITGA2/HLA-DQB1/HLA-DRB1/CCR3/CXCR3/NPR3/PPARG/CXCR4/GABRD/GPR68/CYSLTR2/F2R/CD27/SPN/TREM2/APLNR/HTR2A/HCAR2/ITGB2/CALCR/AXL/ANTXR2/CD69/ITGAL/MET/CD4/CCR5/DNER/P2RY6/FPR1/GABRG3/ALK/TNFRSF1B/CXCR2/CD14/GP1BA/C5AR1/GRM7/GABRG2/CSF1R/ADORA3/HCAR3/SORL1/TLR4/GRID2/PDGFRB/BMPR2/ACVR1/ICAM1/SELE/CCR2/CLEC4A/TGFBR1/FAS
GO:0042379	MF	GO:0042379	chemokine receptor binding	23	0.6609	1.73544	0.00134034	0.0423504	0.0370744	401	tags=74%, list=25%, signal=56%	CCL18/CCL20/CCL19/CXCL10/CCL7/CCL5/CCL21/CCL8/CCL3/CXCL8/CXCL3/CCL4/CXCL6/STAT1/CCL23/CCR2/CX3CL1
GO:0051094	BP	GO:0051094	positive regulation of developmental process	285	0.391195	1.41184	0.00132966	0.0423504	0.0370744	421	tags=37%, list=26%, signal=33%	CSF2/SFN/SULT1E1/ST8SIA2/ADAM12/SERPINB3/IL2RA/TFAP2A/TERT/FN1/PTGS2/IL1A/VCAN/CCL19/FOXP3/CDK1/HLA-DRB1/CD28/CCR3/CXCR3/PPARG/HK2/CXCR4/GPR68/APOE/NEFL/ANXA1/CD27/RUNX2/LTA/TREM2/APLNR/HTR2A/MME/LIF/PKM/IFNG/SERPINE1/PRKCB/TYROBP/AXL/TGM2/CYP1B1/ADAM9/PCK1/IL4/CD4/CXCL8/PLA2G2A/IL23A/HMOX1/ACTB/SYT1/CFL1/GRN/BDNF/SLC8A1/TNF/OXT/ALK/NLRP3/TSPO/TNFSF13B/B4GALT5/JUP/TNFRSF1B/IL2/FGF2/THBS1/IL18/MCU…
GO:0031347	BP	GO:0031347	regulation of defense response	181	0.42837	1.50635	0.00136458	0.0427568	0.0374301	426	tags=39%, list=26%, signal=32%	SFN/MMP9/IDO1/IL2RA/TNFAIP6/PTGS2/FOXP3/MMP3/HLA-DRB1/OAS1/CD28/PPARG/APOE/CCL5/ANXA1/PENK/LTA/SPN/LGALS1/PIK3CG/GRP/TREM2/HTR2A/AHR/IFNG/SERPINE1/TYROBP/FUT7/APCS/IL4/CCL3/CARD16/HCK/PLA2G2A/IL23A/ACP5/BIRC3/GRN/CFH/TNF/CAV1/NLRP3/TNFRSF1B/IL2/IL18/CD14/SNCA/IL1B/CYBA/GPX1/MAPK3/IL6/TLR4/YWHAZ/TTBK1/AGT/CASP1/CXCL6/STAT1/LTF/LDLR/TGFB1/SELE/CCR2/TMSB4X/FYN/CX3CL1/IL10/GSTP1/A2M
GO:0010628	BP	GO:0010628	positive regulation of gene expression	232	0.396705	1.41928	0.0014372	0.0446601	0.0390963	377	tags=34%, list=23%, signal=30%	NOX1/CSF2/IDO1/TFAP2A/FN1/PTGS2/IL1A/NTS/CCL19/ITGA2/FOXP3/CDK1/OAS2/OAS1/CD28/PPARG/CD40LG/CCL5/ANXA1/F2R/SLC24A3/CD55/RUNX2/SLC22A2/LTA/SPN/PIK3CG/TREM2/HTR2A/LIF/PKM/IFNG/SERPINE1/TYROBP/CALCR/CYP1B1/IL4/CCL3/CD4/CXCL8/IL23A/HMOX1/B2M/NOS2/GAPDH/TNF/CAV1/NLRP3/LMNA/IL2/THBS1/GSN/IL18/CD14/C5AR1/IL1B/ENO1/CSF1R/PDE4D/BMP6/CYBA/AKAP12/MAF/IL6/SORL1/TLR4/IL7/HIF1A/TTBK1/PNP/APOB/AGT/CASP1/ITGB3/S…
GO:0006984	BP	GO:0006984	ER-nucleus signaling pathway	14	-0.730155	-1.94615	0.00147623	0.044856	0.0392678	83	tags=14%, list=5%, signal=14%	EIF2AK3/XBP1
GO:0046632	BP	GO:0046632	α-β T cell differentiation	27	0.647515	1.74606	0.00154554	0.044856	0.0392678	375	tags=59%, list=23%, signal=46%	CCL19/FOXP3/HLA-DRB1/ANXA1/SPN/LGALS1/IFNG/FUT7/CD69/IL23A/NLRP3/IL2/IL18/IL6/PNP/ZAP70
GO:0019941	BP	GO:0019941	modification-dependent protein catabolic process	57	-0.471318	-1.70005	0.00154139	0.044856	0.0392678	348	tags=30%, list=21%, signal=24%	NAGLU/SQSTM1/EPM2A/CSNK2A2/KAT5/TF/MAPK9/RPS27A/CSNK2B/LRRK2/PINK1/NEDD4L/HSPA1A/OGT/TRIM45/EGF/XBP1
GO:0043632	BP	GO:0043632	modification-dependent macromolecule catabolic process	57	-0.471318	-1.70005	0.00154139	0.044856	0.0392678	348	tags=30%, list=21%, signal=24%	NAGLU/SQSTM1/EPM2A/CSNK2A2/KAT5/TF/MAPK9/RPS27A/CSNK2B/LRRK2/PINK1/NEDD4L/HSPA1A/OGT/TRIM45/EGF/XBP1
GO:0002821	BP	GO:0002821	positive regulation of adaptive immune response	35	0.595407	1.68285	0.00155087	0.044856	0.0392678	423	tags=57%, list=26%, signal=43%	FOXP3/HLA-DRB1/CD28/CD55/LTA/TREM2/IL4/CD4/IL23A/B2M/TNF/NLRP3/TNFSF13B/IL2/IL18/IL1B/IL6/TGFB1/CCR2/TRAF2
GO:0002824	BP	GO:0002824	positive regulation of adaptive immune response based on somatic recombination of immune receptors built from immunoglobulin superfamily domains	34	0.5986	1.67327	0.001522	0.044856	0.0392678	423	tags=59%, list=26%, signal=44%	FOXP3/HLA-DRB1/CD28/CD55/LTA/TREM2/IL4/CD4/IL23A/B2M/TNF/NLRP3/TNFSF13B/IL2/IL18/IL1B/IL6/TGFB1/CCR2/TRAF2
GO:0002460	BP	GO:0002460	adaptive immune response based on somatic recombination of immune receptors built from immunoglobulin superfamily domains	76	0.503183	1.60836	0.00153013	0.044856	0.0392678	334	tags=46%, list=21%, signal=38%	CD70/CCL19/FOXP3/HLA-DRB1/CD28/CD40LG/ANXA1/CD27/CD55/LTA/SPN/LGALS1/TREM2/C1QA/AHR/PDCD1/C1QC/C1QB/FUT7/CD69/IL4/CD4/IL23A/B2M/TNF/NLRP3/TNFSF13B/TNFRSF1B/IL2/IL18/CD8A/IL1B/C1S/IL6/TLR4
GO:0070663	BP	GO:0070663	regulation of leukocyte proliferation	81	0.493319	1.59267	0.00151761	0.044856	0.0392678	482	tags=52%, list=30%, signal=38%	CSF2/CD70/IDO1/IL2RA/IL1A/CCL19/FOXP3/HLA-DRB1/CTLA4/CD28/CD40LG/CCL5/ANXA1/CD55/SPN/CCL8/AHR/TYROBP/IL4/IL23A/CD38/TNFSF13B/TNFRSF1B/IL2/IL18/IL1B/CSF1R/MAPK3/IL6/TLR4/IL7/PNP/TGFB1/ZAP70/CCR2/IL10/GSTP1/PRNP/LYN/KIT/VCAM1/GAL
GO:0007186	BP	GO:0007186	G protein-coupled receptor signaling pathway	180	0.430558	1.51405	0.00150164	0.044856	0.0392678	403	tags=39%, list=25%, signal=33%	CCL18/HCAR1/CCL20/NTS/HRH1/CCL19/CXCL10/PTHLH/CCL7/CCR3/CXCR3/NPR3/PPARG/CXCR4/GPR68/APOE/CCL5/CYSLTR2/ANXA1/F2R/CCL21/PENK/PIK3CG/GRP/TREM2/CCL8/APLNR/HTR2A/HCAR2/PRKCB/CALCR/HCRT/TGM2/MET/CCL3/CXCL8/CXCL3/CCR5/P2RY6/FPR1/ALK/CAV1/IL2/CCL4/ADCY2/PLCB4/CXCR2/GP1BA/SNCA/C5AR1/GRM7/GNAI2/ADORA3/PDE4D/AKAP12/HCAR3/SORL1/HIF1A/PDGFRB/AGT/CXCL6/ITGB3/GNAI1/GRK5/CCL23/GUCY2D/SELE/CCR2/FYN/CX3CL1/ACE
GO:0048020	MF	GO:0048020	CCR chemokine receptor binding	16	0.7299	1.76354	0.00160948	0.0461958	0.0404407	401	tags=81%, list=25%, signal=62%	CCL18/CCL20/CCL19/CCL7/CCL5/CCL21/CCL8/CCL3/CCL4/STAT1/CCL23/CCR2/CX3CL1
GO:0170038	BP	GO:0170038	GO:0170038	14	-0.7228	-1.92654	0.00171117	0.0487424	0.04267	200	tags=43%, list=12%, signal=38%	MTR/PAH/CTH/AASS/GLS2/CBS
GO:0043154	BP	GO:0043154	negative regulation of cysteine-type endopeptidase activity involved in apoptotic process	16	0.727123	1.75683	0.00173621	0.048793	0.0427144	323	tags=56%, list=20%, signal=46%	MMP9/PTGS2/PLAUR/BIRC5/CARD16/TNF/THBS1/SNCA/GPX1
GO:0035295	BP	GO:0035295	tube development	224	0.407518	1.45123	0.0017389	0.048793	0.0427144	421	tags=38%, list=26%, signal=33%	NOX1/ADAM12/COMP/COL3A1/TERT/FN1/PTGS2/IL1A/CXCL10/ITGB6/XDH/CDH2/CCR3/CXCR3/NPR3/PPARG/HK2/CXCR4/APOE/ANXA1/PIK3CG/CCL8/APLNR/PITX2/MME/LIF/PKM/SERPINE1/PRKCB/PXDN/MMP2/VASP/TGM2/CYP1B1/GBX2/COL4A1/MET/CXCL8/HMOX1/FASLG/GRN/ASS1/TNF/CAV1/JUP/LRP1/FGF2/THBS1/IL18/C5AR1/IL1B/TGFB2/ITGA5/CSF1R/GPX1/MAPK3/IL6/HIF1A/PDGFRB/YWHAZ/IGFBP7/APOB/COL2A1/ANXA3/AGT/LMO4/ITGB3/TGFA/STAT1/PGK1/LDLR/TGFB1/BMPR2…
GO:1903131	BP	GO:1903131	mononuclear cell differentiation	124	0.453427	1.54637	0.00176122	0.0490531	0.0429421	345	tags=39%, list=21%, signal=33%	CSF2/MMP9/MS4A1/IL2RA/IL1A/CCL19/FOXP3/ITGB6/HLA-DRB1/CTLA4/CD28/LCK/PPARG/GPR68/CD40LG/ANXA1/CD27/RUNX2/SPN/LGALS1/TREM2/ITGA4/LIF/IFNG/UCP2/AXL/C1QC/FUT7/CD69/APCS/PCK1/IL4/CD4/IL23A/ACTB/B2M/NLRP3/TNFSF13B/IL2/IL18/CD8A/IL1B/CSF1R/IL6/TRPM2/TLR4/IL7/PNP
GO:0002696	BP	GO:0002696	positive regulation of leukocyte activation	92	0.4849	1.59674	0.00179383	0.0495942	0.0434157	400	tags=51%, list=25%, signal=41%	CD70/IL2RA/IL1A/CCL19/FOXP3/HLA-DQB1/HLA-DRB1/HLA-DRB5/CD28/LCK/CD40LG/CCL5/ANXA1/CCL21/CD27/CD55/SPN/LGALS1/TREM2/IFNG/TYROBP/AXL/PCK1/IL4/CCL3/CD4/IL23A/ACTB/B2M/CD38/TNF/CAV1/NLRP3/TNFSF13B/IL2/THBS1/IL18/IL1B/IL6/TLR4/IL7/TTBK1/PNP/TGFB1/ZAP70/CCR2/FYN
BP, Biological Process; CC, Cellular Component; MF, Molecular Function.
